# Supplementary material for: Retrospective cohort study on risk of hearing loss in patients with rheumatoid arthritis using claims data
Source: PubMed Central journal article supplement — BMJ Open. 2018 Jan 5;8(1):e018134. doi: 10.1136/bmjopen-2017-018134 (PMC5780710; doi:10.1136/bmjopen-2017-018134), 2018-01-05
Supplement: bmjopen-2017-018134.draft_revisions.pdf [file bmjopen-2017-018134.draft_revisions.pdf]

# BMJ Open

BMJ Open is committed to open peer review. As part of this commitment we make the peer review history of every article we publish publicly available.

When an article is published we post the peer reviewers' comments and the authors' responses online. We also post the versions of the paper that were used during peer review. These are the versions that the peer review comments apply to.

The versions of the paper that follow are the versions that were submitted during the peer review process. They are not the versions of record or the final published versions. They should not be cited or distributed as the published version of this manuscript.

BMJ Open is an open access journal and the full, final, typeset and author-corrected version of record of the manuscript is available on our site with no access controls, subscription charges or pay-per-view fees (<http://bmjopen.bmj.com>).

If you have any questions on BMJ Open's open peer review process please email [editorial.bmjopen@bmj.com](mailto:editorial.bmjopen@bmj.com)

# BMJ Open

## Hearing loss associated with rheumatoid arthritis: a nationwide retrospective cohort study

|                                 |                                                                                                                                                    |
|---------------------------------|----------------------------------------------------------------------------------------------------------------------------------------------------|
| Journal:                        | <i>BMJ Open</i>                                                                                                                                    |
| Manuscript ID                   | bmjopen-2017-018134                                                                                                                                |
| Article Type:                   | Cohort profile                                                                                                                                     |
| Date Submitted by the Author:   | 15-Jun-2017                                                                                                                                        |
| Complete List of Authors:       | Huang, Chung-Ming<br>Chen, Hsuan-Ju; China Medical University Hospital<br>Huang, Po-Hao<br>Tsay, Gregory J<br>Lan, Joung-Liang<br>Sung, Fung-Chang |
| <b>Primary Subject Heading</b>: | Rheumatology                                                                                                                                       |
| Secondary Subject Heading:      | Epidemiology, Ear, nose and throat/otolaryngology                                                                                                  |
| Keywords:                       | Rheumatoid arthritis, hearing loss, insurance data,, retrospective cohort study                                                                    |
|                                 |                                                                                                                                                    |

SCHOLARONE™  
Manuscripts

1  
2  
3  
4 **Hearing loss associated with rheumatoid arthritis: a nationwide**  
5  
6 **retrospective cohort study**  
7  
8

9 Chung-Ming Huang<sup>1,2</sup>, Hsuan-Ju Chen<sup>3,4</sup>, Po-Hao Huang<sup>1</sup>, Gregory J Tsay<sup>1</sup>,  
10  
11  
12 Joung-Liang Lan<sup>1</sup>, Fung-Chang Sung<sup>3,5</sup>  
13  
14

15 **Running Title:** Hearing loss in rheumatoid arthritis  
16

17  
18 <sup>1</sup>Division of Immunology and Rheumatology, Department of Internal Medicine,  
19  
20 China Medical University Hospital, Taichung, Taiwan;  
21  
22

23 <sup>2</sup>Graduate Institute of Integrated Medicine, College of Chinese Medicine, China  
24  
25 Medical University, Taichung, Taiwan  
26  
27

28  
29 <sup>3</sup>Management Office for Health Data, China Medical University Hospital, Taichung,  
30  
31 Taiwan  
32  
33

34 <sup>4</sup>College of Medicine, China Medical University, Taichung, Taiwan  
35  
36

37 <sup>5</sup>Department of Health Services Administration, China Medical University, Taichung,  
38  
39 Taiwan  
40  
41

42 Corresponding author:

43 Fung-Chang Sung, PhD, MPH

44 Department of Health Services Administration, China Medical University

45 91 Hsueh Shih Road

46 Taichung 404, Taiwan

47 Tel: 886-4-2205-4070

48 Fax: 886-4-2233-9216

49 E-mail: fcsung1008@yahoo.com  
50  
51  
52

53  
54 Word count: Abstract, 186; Text, 2232; Tables, 3; Figures, 2  
55  
56  
57  
58  
59  
60

## ABSTRACT

### **Purposes:**

Hearing loss (HL) has been reported as a manifestation of systemic vascular involvement in patients with an autoimmune disease. However, population studies on HL associated with rheumatoid arthritis (RA) are lacking. This study aimed to investigate the risk of developing HL in patients with RA using a nationwide cohort.

### **Participants:**

We used the National Health Insurance Research Database (NHIRD) of Taiwan from 2000 to 2006 and identified 18,267 patients newly diagnosed as having RA and 73,068 subjects without RA who were frequency-matched by sex, age, and index year. We estimated incidence of HL in both cohorts and the RA cohort to non-RA cohort hazard ratios (HRs) adjusted for sex, age, and comorbidities.

### **Findings to date:**

The incidence of HL was higher in the RA cohort than in the non-RA cohort (3.08 versus 1.62 per 1000 person-years), with an adjusted HR of 1.89 (95% confidence interval = 1.68-2.12) for the RA cohort relative to the non-RA cohort after controlling for age, sex, and comorbidities. Men were at a higher risk than women, and the risk

1  
2  
3  
4 increased with age. Cardiovascular comorbidities were consistently associated with a  
5  
6 high HL risk in patients with RA compared with those without RA.  
7  
8  
9

10 **Conclusions:**

11  
12  
13  
14 This nationwide population-based retrospective cohort study demonstrates that  
15  
16 patients with RA are at an elevated risk of developing HL. Moreover, cardiovascular  
17  
18 comorbidities could increase HL risk.  
19  
20  
21  
22

23 **Keywords:** Rheumatoid arthritis, hearing loss, insurance data, retrospective cohort  
24  
25 study  
26  
27  
28  
29  
30  
31  
32  
33  
34  
35  
36  
37  
38  
39  
40  
41  
42  
43  
44  
45  
46  
47  
48  
49  
50  
51  
52  
53  
54  
55  
56  
57  
58  
59  
60

review only

### Strengths and limitations of this study

1. The strength of this study is the use of a nationwide population-based cohort to identify HL risk in an Asian population with RA. Our findings can be generalized to the general population.
2. The large sample size allowed the identification of risk factors associated with the development of HL in Taiwan with a minimal tendency for selection bias, and enhanced the statistical power and precision of risk appraisal.
3. In addition, the inclusion of the Catastrophic Illness Patient Database (CIPD) confirmed the diagnoses of all RA cases in the NHIRD database, which increased the reliability of our data.
4. several limitations to the interpretation of our findings should be considered. Information on several suspected risk factors for HL, such as smoking and chronic exposure to occupational and environmental noise, which could be associated with HL in the general population, were not available in the insurance database.
5. Moreover, information on laboratory test results or HL severity was not available in the insurance claims data, and data on RA severity scale, such as disease activity, functional impairment, and physical damage, was also unavailable.

## Introduction

Rheumatoid arthritis (RA) is a disease predominantly characterized by chronic joint inflammation and is often accompanied by several peripheral inflammatory manifestations [1]. RA may lead to the destruction of the cartilage and bone due to chronic synovitis and may consequently impair joint function [2]. In addition, patients with RA may have extra-articular manifestations involving other organ systems [3], such as auditory system alteration, although with a different putative mechanism of damage [4–6]. With respect to the auditory system, previous studies have shown conflicting findings, both as to the types of hearing loss and as to the RA disease activity and severity associated with hearing levels [7-10].

A wide variation in the reported prevalence of different types of hearing loss in patients with RA exists. Sensorineural hearing loss (SNHL) is the most common hearing impairment in patients with RA, ranging from 25 to 72% [11], whereas conductive hearing loss and mixed hearing loss are less frequently reported [12-14]. SNHL could be induced by a direct immune response of either T or B cells against inner ear proteins [15]. Neurovascular inflammation and drugs used for RA treatment could also damage the cochlea [16]. Thus, hearing loss (HL) may be a manifestation of systemic vascular involvement in patients with RA and may have a significant effect on the health of patients with RA. However, the risk of developing HL in

1  
2  
3  
4 patients with RA has not been well examined using population data.  
5

6 Hence, the purpose of this study was to investigate the HL incidence in patients  
7  
8 with RA. Using representative insurance claims data obtained from the Taiwan  
9  
10 National Health Insurance (NHI), the risk of developing HL in patients with RA was  
11  
12 examined. The effects of comorbidities, such as coronary heart disease, hypertension,  
13  
14 stroke, diabetes, hyperlipidemia, hyperthyroidism, and chronic renal disease, on the  
15  
16 risk of developing HL were also evaluated.  
17  
18  
19  
20  
21  
22

## 23 **Materials and Methods**

### 24 **Data source**

25  
26  
27 The Taiwan NHI system is a single-payer compulsory programme with a  
28  
29 coverage of over 99% of 23.74 million people [17]. We conducted this study using  
30  
31 two data sets: the Registry for Catastrophic Illness Patient Database (CIPD) and the  
32  
33 Longitudinal Health Insurance Database (LHID2000) from the Taiwan National  
34  
35 Health Research Institutes. The registry for CIPD contains health claims data of  
36  
37 patients who had major diseases, such as cancer, chronic mental illness, end-stage  
38  
39 renal disease, and several autoimmune diseases requiring long-term care, and who  
40  
41 were eligible for exemption from making co-payment. The LHID2000 contains the  
42  
43 claims data of 1,000,000 people randomly sampled from all populations that  
44  
45 registered in 2000 for the insurance coverage. Reimbursement claims data for medical  
46  
47  
48  
49  
50  
51  
52  
53  
54  
55  
56  
57  
58  
59  
60



1  
2  
3  
4 services from 1996 to 2011 in both data sets were also used in this study. For privacy  
5  
6 protection, all personal identifications were replaced with surrogate identifications  
7  
8 suitable for public use and data linkage. The claims data contained information on the  
9  
10 demographic status of the insured people, dates of treatment and treatments received,  
11  
12 diagnostic codes, prescriptions, and costs. Diagnosis was coded with the International  
13  
14 Classification of Disease Diagnoses, 9th Revision of Clinical Modification  
15  
16 (ICD-9-CM). Several studies in Taiwan in the NHIRD demonstrated the high  
17  
18 accuracy and validity of ICD-9 diagnosis [18-19]. This study was approved by the  
19  
20 Research Ethics Committee of China Medical University and Hospital  
21  
22 (CMUH104-REC2-115).  
23  
24  
25  
26  
27  
28  
29  
30

### 31 **Study participants**

32  
33  
34 Figure 1 shows the flowchart of the subject selection process in this study using a  
35  
36 population-based retrospective cohort study design. We identified a RA cohort from  
37  
38 the registry for CIPD and a non-RA cohort from the LHID2000. Patients newly  
39  
40 diagnosed as having RA (ICD-9-CM 714.0) from 2000 to 2006 and without HL were  
41  
42 identified for the RA cohort. The date of diagnosis in the catastrophic illness  
43  
44 certificates was considered as the index date for the approved patients. Patients who  
45  
46 met four or more of the diagnostic criteria based on the 1987 American College of  
47  
48 Rheumatology criteria and were newly diagnosed as having RA and those diagnosed  
49  
50  
51  
52  
53  
54  
55  
56  
57  
58  
59  
60

1  
2  
3  
4 by rheumatologists were included in the RA cohort [20]. The application for  
5  
6 catastrophic illness status was scrutinized by peer review. The patients with RA with a  
7  
8 catastrophic illness card can be exempted from paying a co-payment.  
9  
10

11  
12 For each patient with RA, four insured people without history of RA and HL  
13  
14 were randomly selected from the LHID2000 for the non-RA group and were  
15  
16 frequency-matched by sex, age (each 5-year span), and index year. Individuals with  
17  
18 missing information on age and/or sex and with history of HL (ICD-9-CM 388.2,  
19  
20 388.4, 389.00, 389.10, 389.12, 389.2, and 389.9) at baseline were excluded from this  
21  
22 study.  
23  
24  
25  
26  
27  
28

29 The principal outcome was the development of HL during the follow-up period.  
30  
31 Both cohorts were followed from the index date to the date of HL diagnosis,  
32  
33 withdrawal from the NHI system, or the end of 2011. Patients suspected of having HL  
34  
35 received comprehensive examinations and, subsequently, treatment when the disorder  
36  
37 was confirmed. In the insurance system, HL patients' medical reimbursement and  
38  
39 discharge notes are scrutinised by peer review.  
40  
41  
42  
43  
44  
45

#### 46 **Statistical analysis**

47  
48

49 Distributions of sex and age (20-39, 40-59, and  $\geq 60$  years) and baseline  
50  
51 comorbidities, including diabetes (ICD-9-CM 250), hyperlipidemia (ICD-9-CM 272),  
52  
53 hypertension (ICD-9-CM 401-405), hyperthyroidism (ICD-9-CM 242), ischemic heart  
54  
55  
56  
57  
58  
59  
60

1  
2  
3  
4 disease (IHD; ICD-9-CM 410-414), stroke (ICD-9-CM 430-438), and chronic kidney  
5  
6 disease (CKD; ICD-9-CM 580-589), between the RA and non-RA cohorts were  
7  
8 compared. We considered a standardized mean difference of less than 0.1 as a  
9  
10 negligible difference between two means or two prevalence rates [21]. The incidence  
11  
12 rate of HL was calculated as the number of incident HL identified during the  
13  
14 follow-up period divided by the total follow-up person-years for each cohort  
15  
16 according to sex, age, and each comorbidity. The Kaplan-Meier method was  
17  
18 employed to plot the cumulative incidence of HL for each cohort during the follow-up  
19  
20 period, and the log-rank test was used to assess the differences between the two  
21  
22 curves. Univariate and multivariate Cox proportional hazards regression analyses  
23  
24 were used to measure the crude hazard ratio (cHR) and adjusted hazard ratio (aHR) of  
25  
26 HL, respectively, and their 95% confidence intervals (CIs). Sex, age, and  
27  
28 comorbidities, including diabetes, hyperlipidemia, hypertension, hyperthyroidism,  
29  
30 IHD, stroke, and CKD, were included as covariates in the multivariate Cox regression  
31  
32 analysis. To further assess the robustness of our results, we also evaluated the  
33  
34 association between RA and HL risk in various subgroups by sex, age, and each  
35  
36 comorbidity.  
37  
38  
39  
40  
41  
42  
43  
44  
45  
46  
47  
48  
49

50  
51 All analyses were conducted using SAS statistical software (version 9.4 for  
52  
53 Windows; SAS Institute, Cary, North Carolina, USA), and all statistical tests were  
54  
55  
56  
57  
58  
59  
60

1  
2  
3  
4 performed at the two-tailed significance level of 0.05.  
5  
6  
7

## 8 9 **Results**

10  
11  
12 In this study, we identified 18,267 RA patients newly diagnosed from 2000 to  
13  
14 2006 as the RA cohort and 73,068 persons without RA as the non-RA cohort (Table  
15  
16 1). Distributions of sex, with more women than men (78.4 vs. 21.6%), and age were  
17  
18 similar between the RA and non-RA cohorts. Approximately 33.3% of the study  
19  
20 population was  $\geq 60$  years old. Comorbidities of CKD was more prevalent in patients  
21  
22 with RA than in subjects without RA at the baseline.  
23  
24  
25  
26  
27

28  
29 The cumulative incidence of HL by the end of follow-up, estimated by the  
30  
31 Kaplan-Meier method, was 1.5% greater in the RA cohort than in the non-RA cohort  
32  
33 (3.3 vs. 1.8%;  $p$  value  $< 0.001$  in the log-rank test) (Fig. 2). The HL incidence density  
34  
35 was approximately two-fold greater in the RA cohort than in the non-RA cohort (3.08  
36  
37 vs. 1.62 per 1000 person-years), with an aHR of 1.89 (95% CI = 1.68-2.12) (Table 2).  
38  
39 Men were at a greater risk of HL than women, and the risk increased with age.  
40  
41 Compared to 20–39 years old, the aHRs of HL were 2.72 (95% CI = 2.08-3.57) and  
42  
43 4.97 (95% CI = 3.77-6.56) for those aged 40-59 and  $\geq 60$  years, respectively. The risk  
44  
45 of individuals with comorbidities was also elevated.  
46  
47  
48  
49  
50  
51  
52

53  
54 Table 3 shows that incidence rates of HL stratified by sex, age, and comorbidity  
55  
56  
57  
58  
59  
60

1  
2  
3  
4 were consistently greater in the RA cohort than in the non-RA cohort. Moreover, men  
5  
6 had a higher HL incidence than women in both cohorts (i.e., 4.09 per 1000  
7  
8 person-years in men with RA, which was nearly three-fold greater than that in women  
9  
10 without RA). Additionally, the HL incidence was greater in patients with each of the  
11  
12 comorbidities than without it in both cohorts. The excess rate was generally greater in  
13  
14 patients with RA; those with IHD had the highest incident HL, i.e., 5.60 per 1000  
15  
16 person-years. The RA cohort to non-RA cohort hazard ratios (HRs) were generally  
17  
18 similar to the overall HR between the RA and non-RA cohorts (Table 2).  
19  
20  
21  
22  
23  
24  
25  
26  
27  
28

## 29 **Discussion**

30  
31  
32 This retrospective cohort study showed that patients with RA were nearly two-fold  
33  
34 more likely to develop HL than the general population (Table 2). In the RA cohort, the  
35  
36 patients  $\geq 60$  years old had an HL incidence of 4.92 per 1000 person-years, which was  
37  
38 greater than that of patients age 20-39 years. The corresponding difference was 2.99 per  
39  
40 1000 person-years in the non-RA cohort, reflecting the natural HL by aging in the  
41  
42 general population. The effect of HL associated with RA increased with age. This  
43  
44 finding is consistent with that of previous studies of patients with SNHL comorbid with  
45  
46 systemic lupus erythematosus [22] and psoriasis [23]. The risk could increase for 50%  
47  
48  
49  
50  
51  
52  
53  
54  
55  
56  
57  
58  
59  
60 in patients with psoriasis.

1  
2  
3  
4 Moreover, we found that, in the RA cohort, men had an incidence of 4.09 per  
5  
6 1000 person-years for HL, which was greater than women had. The corresponding  
7  
8 difference was 2.24 per 1000 person-years in the non-RA cohort, indicating a greater  
9  
10 HL effect in men with RA. In the entire study population, the overall aHR was 1.39 in  
11  
12 men (Table 2). There is a remarkable imbalance between the number of males and  
13  
14 females with autoimmune diseases, with females representing the majority of cases.  
15  
16 Although the reasons for this overrepresentation of women are unclear, genetic  
17  
18 (X-linked) factors and hormonal aspects are likely involved. Halligan et al. [24]  
19  
20 investigated patients with RA and demonstrated that the prevalence of abnormal  
21  
22 hearing is significantly greater in males (86% or 12/14) than in females (33% or 5/15)  
23  
24 ( $p = 0.008$ ). However, no gender difference in hearing impairment among those without  
25  
26 RA was found ( $p = 0.715$ ).  
27  
28  
29  
30  
31  
32  
33  
34  
35  
36

37 In this study, most baseline comorbidities were more prevalent in the RA cohort  
38  
39 than in controls. Factors associated with RA and the related comorbid chronic diseases  
40  
41 could be underlying the association between RA and the subsequent development of  
42  
43 HL. However, the mechanisms underlying the higher HL risk in patients with RA  
44  
45 remain unclear.  
46  
47  
48  
49  
50

51 Evidence shows that patients with RA are prevalent with comorbid diseases, such  
52  
53 as IHD, diabetes, hypertension, and dyslipidemia [25]. The development of RA and the  
54  
55  
56  
57  
58  
59  
60

1  
2  
3  
4 breakdown of atherosclerotic plaques possibly have common factors contributing to  
5  
6 inflammatory cells and proinflammatory cytokines [26]. For example, tumor necrosis  
7  
8 factor (TNF)- $\alpha$ , an inflammatory cytokine, is involved in the pathogenesis of both RA  
9  
10 and atherosclerosis [27]. It is possible that both RA and HL have a shared mechanism  
11  
12 associating with cardiovascular diseases which account for the higher risk of hearing  
13  
14 loss in patients with RA. Moreover, in this study, we found that patients with RA with  
15  
16 IHD had the highest HL incidence compared with patients with other cardiovascular  
17  
18 disorders. Hence, RA and cardiovascular disorders may have a shared contribution to  
19  
20 HL risk.  
21  
22  
23  
24  
25  
26  
27  
28

29 Furthermore, several studies [28,29] have reported elevated plasma renin and  
30  
31 angiotensin-converting enzyme (ACE) activities in patients with RA. Poor blood  
32  
33 pressure control could induce changes in the renin-angiotensin system. Higher  
34  
35 oxidative stress in patients with RA could also impair the vasodilatory mechanism of  
36  
37 the endothelium [29], which could be associated with the higher HL risk in patients  
38  
39 with RA. Hence, hypertension is likely another risk factor contributing to HL. The  
40  
41 findings in our study further demonstrate the association between autoimmune disease  
42  
43 and HL risk.  
44  
45  
46  
47  
48  
49  
50

51 The strength of this study is the use of a nationwide population-based cohort to  
52  
53 identify HL risk in an Asian population with RA. Our findings can be generalized to the  
54  
55  
56  
57  
58  
59  
60

1  
2  
3  
4 general population. The large sample size allowed the identification of risk factors  
5  
6 associated with the development of HL in Taiwan with a minimal tendency for  
7  
8 selection bias, and enhanced the statistical power and precision of risk appraisal. In  
9  
10 addition, the inclusion of the CIPD confirmed the diagnoses of all RA cases in the  
11  
12 NHIRD database, which increased the reliability of our data.  
13  
14  
15

16  
17  
18 However, several limitations to the interpretation of our findings should be  
19  
20 considered. Information on several suspected risk factors for HL, such as smoking and  
21  
22 chronic exposure to occupational and environmental noise, which could be associated  
23  
24 with HL in the general population, were not available in the insurance database.  
25  
26 Moreover, information on laboratory test results or HL severity was not available in the  
27  
28 insurance claims data, and data on RA severity scale, such as disease activity,  
29  
30 functional impairment, and physical damage, was also unavailable.  
31  
32  
33  
34  
35

36  
37  
38 In conclusion, this study provided further evidence of the association between  
39  
40 autoimmune disease and the development of HL. RA was significantly associated with  
41  
42 an elevated risk of developing HL, and cardiovascular disorders could increase HL risk.  
43  
44 Our findings also suggest the need for prompt and early detection of RA for HL  
45  
46 prevention. Appropriate and timely medical interventions may improve the prognosis of  
47  
48 hearing loss in patients diagnosed as having RA.  
49  
50  
51  
52  
53  
54  
55  
56  
57  
58  
59  
60



## Acknowledgments

We would like to thank the Taiwan Ministry of Health and Welfare Clinical Trial and Research Center of Excellence (MOHW106-TDU-B-212-113004); China Medical University Hospital; Academia Sinica Taiwan Biobank, Stroke Biosignature Project (BM10501010037); NRPB Stroke Clinical Trial Consortium (MOST 105-2325-B-039-003); Tseng-Lien Lin Foundation, Taichung, Taiwan; Taiwan Brain Disease Foundation, Taipei, Taiwan; and Katsuzo and Kiyo Aoshima Memorial Funds, Japan, for their support.

**Conflict of interest:** None.

## Footnotes:

**Contributors:** C-MH and F-CS conceived and designed the study. C-MH wrote the manuscript and revised the important intellectual content. Data were analysed by F-CS and H-JC. F-CS revised important intellectual content and was responsible for the final version of the manuscript. Conception and design summary: C-MH, P-HH, GJT and J-LL. All authors read and approved the final manuscript.

**Competing interests:** None declared.

**Provenance and peer review:** Not commissioned; externally peer reviewed.

1  
2  
3  
4 **Data sharing statement:** No additional data are available.  
5  
6  
7  
8  
9  
10  
11  
12  
13  
14  
15  
16  
17  
18  
19  
20  
21  
22  
23  
24  
25  
26  
27  
28  
29  
30  
31  
32  
33  
34  
35  
36  
37  
38  
39  
40  
41  
42  
43  
44  
45  
46  
47  
48  
49  
50  
51  
52  
53  
54  
55  
56  
57  
58  
59  
60

For peer review only

**References:**

1. Feldmann M, Brennan FM, Maini RN. Rheumatoid arthritis. *Cell* 1996;85:307-310.
2. Harris ED Jr. Rheumatoid arthritis: pathophysiology and implications for therapy. *N Engl J Med* 1990;322:1277-1289.
3. Ozcan M, Karakus MF, Gunduz OH, Tuncel U, Sahin H. Hearing loss and middle ear involvement in rheumatoid arthritis. *Rheumatol Int* 2002;22:16–19.
4. Murdin L, Patel S, Walmsley J, Yeoh LH. Hearing difficulties are common in patients with rheumatoid arthritis. *Clin Rheumatol* 2008;27:637–640.
5. Halligan CS, Bauch CD, Brey RH, Achenbach SJ, Bamlet WR, McDonald TJ, et al. Hearing loss in rheumatoid arthritis. *Laryngoscope* 2006;116:2044–2049.
6. Takatsu M, Higaki M, Kinoshita H, Mizushima Y, Koizuka I. Ear involvement in patients with rheumatoid arthritis. *Otol Neurotol* 2005;26:755–761.
7. Elwany S, Garf A, Kamel T. Hearing and middle ear function in rheumatoid arthritis. *J Rheumatol* 1986;13:878–881.
8. Magaro M, Zoli A, Altomonte Z, Mirone L, Corvino G, Di Girolamo S, et al. Sensorineural hearing loss in rheumatoid arthritis. *Clin Exp Rheum* 1990;8:487–490.

- 1  
2  
3  
4 9. Takatsu M, Higaki M, Kinoshita H, Mizushima Y, Koizuka I. Ear involvement in  
5  
6 patients with rheumatoid arthritis. *Otol Neurotol* 2005;26:755–761.  
7  
8
- 9  
10 10. Salvinelli F, Cancilleri F, Casale M, Luccarelli V, Di Peco V, D’Ascanio L, et al.  
11  
12 Hearing thresholds in patients affected by rheumatoid arthritis. *Clin Otolaryngol*  
13  
14 2014;29:75–79.  
15  
16
- 17  
18 11. Pascual-Ramos V, Contreras-Yáñez I, Rivera-Hoyos P, Enríquez L,  
19  
20 Ramírez-Anguiano J. Cumulative disease activity predicts incidental hearing  
21  
22 impairment in patients with rheumatoid arthritis (RA). *Clin Rheumatol* 2014; 33(3):  
23  
24 315–321.  
25  
26  
27
- 28  
29 12. Takatsu M, Higaki M, Kinoshita H, Mizushima Y, Koizuka I. Ear involvement in  
30  
31 patients with rheumatoid arthritis. *Otol Neurotol* 2005;26(4):755–761.  
32  
33
- 34  
35 13. Murdin L, Patel S, Walmsley J, Yeoh LH. Hearing difficulties are common in  
36  
37 patients with rheumatoid arthritis. *Clin Rheumatol* 2008;27(5):637–640.  
38  
39
- 40  
41 14. Bayazit YA, Yilmaz M, Gunduz B, Altinyay S, Kemaloglu YK, Onder M, et al.  
42  
43 Distortion product otoacoustic emission findings in Behçet’s disease and  
44  
45 rheumatoid arthritis. *ORL J Otorhinolaryngol Relat Spec* 2007;69(4):233–238.  
46  
47
- 48  
49 15. Mijovic T, Zeitouni A, Colmegna I. Autoimmune sensorineural hearing loss: the  
50  
51 otology-rheumatology interface. *Rheumatology (Oxford)* 2013;52:780–789.  
52  
53  
54  
55  
56  
57  
58  
59

- 1  
2  
3  
4 16. Ozturk A, Yalcin S, Kaygusuz I, Sahin S, Gok U, Karlidag T, et al. High-frequency  
5  
6 hearing loss and middle ear involvement in rheumatoid arthritis. *Am J Otolaryngol*  
7  
8  
9 2014;25:411–417.  
10  
11  
12 17. Cheng SH, Chen CC, Tsai SL. The impacts of DRG-based payments on health care  
13  
14 provider behaviors under a universal coverage system: a population-based study.  
15  
16 *Health Policy* 2012;107:202–208.  
17  
18  
19 18. Cheng CL, Kao YH, Lin SJ, Lee CH, Lai ML. Validation of the National Health  
20  
21 Insurance Research Database with ischemic stroke cases in Taiwan.  
22  
23 *Pharmacoepidemiol Drug Saf* 2011;20:236–242.  
24  
25  
26  
27  
28 19. Yu YB, Gau JP, Liu CY, Yang MH, Chiang SC, Hsu HC, et al. A nation-wide  
29  
30 analysis of venous thromboembolism in 497 180 cancer patients with the  
31  
32 development and validation of a risk-stratification scoring system. *Thromb*  
33  
34 *Haemost* 2012;108:225–235.  
35  
36  
37  
38  
39 20. Arnett FC, Edworthy SM, Bloch DA, McShane DJ, Fries JF, Cooper NS, et al. The  
40  
41 American Rheumatism Association 1987 revised criteria for the classification of  
42  
43 rheumatoid arthritis. *Arthritis Rheum* 1988;3:315–324.  
44  
45  
46  
47  
48 21. Mamdani M, Sykora K, Li P, Normand SL, Streiner DL, Austin PC, et al.  
49  
50 Reader's guide to critical appraisal of cohort studies: 2. Assessing potential for  
51  
52 confounding. *BMJ* 2005; 330: 960–2.  
53  
54  
55  
56  
57  
58  
59  
60

- 1  
2  
3  
4 22. Lin C, Lin SW, Weng SF, Lin YS. Risk of sudden sensorineural hearing loss in  
5  
6 patients with systemic lupus erythematosus: a population-based cohort study.  
7  
8 Audiol Neurotol 2013;18(2):95–100.  
9  
10  
11  
12 23. Yen YC, Lin YS, Weng SF, Lai FJ. Risk of sudden sensorineural hearing loss in  
13  
14 patients with psoriasis: a retrospective cohort study. Am J Clin Dermatol  
15  
16 2015;16(3):213–220.  
17  
18  
19  
20 24. Halligan CS, Bauch CD, Brey RH, Achenbach SJ, Bamlet WR, McDonald TJ, et al.  
21  
22 Hearing loss in rheumatoid arthritis. Laryngoscope 2006;116(11):2044–2049.  
23  
24  
25  
26 25. Chung CP, Oeser A, Solus JF, Avalos I, Gebretsadik T, Shintani A, et al.  
27  
28 Prevalence of the metabolic syndrome is increased in rheumatoid arthritis and is  
29  
30 associated with coronary atherosclerosis. Atherosclerosis 2008;196(2):756–763.  
31  
32  
33  
34 26. Hansson GK. Inflammatory mechanisms in atherosclerosis. J Thromb Haemost  
35  
36 2009;7(Suppl 1):328–331.  
37  
38  
39  
40 27. Libby P. Role of inflammation in atherosclerosis associated with rheumatoid  
41  
42 arthritis. Am J Med 2008;121:S21–31.  
43  
44  
45  
46 28. Samoriadova OS, Zharova EA, Masenko VP, Balabanova RM, Vil'chinskaia MIu,  
47  
48 Nasonov EL. The renin-angiotensin-aldosterone system and arterial hypertension in  
49  
50 patients with rheumatoid arthritis. Klin Med (Mosk). 1991;69(2):69–71.  
51  
52  
53  
54 29. Sakuta T, Morita Y, Satoh M, Fox DA, Kashihara N. Involvement of the  
55  
56  
57  
58  
59  
60

1  
2  
3  
4  
5  
6  
7  
8  
9  
10  
11  
12  
13  
14  
15  
16  
17  
18  
19  
20  
21  
22  
23  
24  
25  
26  
27  
28  
29  
30  
31  
32  
33  
34  
35  
36  
37  
38  
39  
40  
41  
42  
43  
44  
45  
46  
47  
48  
49  
50  
51  
52  
53  
54  
55  
56  
57  
58  
59  
60

renin-angiotensin system in the development of vascular damage in a rat model of  
arthritis: effect of angiotensin receptor blockers. Arthritis Rheum 2010;62(5):1319–  
1328.

For peer review only

Table 1. Distribution of demographic factors and comorbidity between cohorts

| Variable        | Non-RA cohort<br>N = 73,068 |        | RA cohort<br>N = 18,267 |        | Standardized mean<br>difference |
|-----------------|-----------------------------|--------|-------------------------|--------|---------------------------------|
|                 | n                           | %      | n                       | %      |                                 |
| Sex             |                             |        |                         |        |                                 |
| Female          | 57,288                      | 78.4   | 14322                   | 78.4   | <0.001                          |
| Male            | 15,780                      | 21.6   | 3945                    | 21.6   | <0.001                          |
| Age, years      |                             |        |                         |        |                                 |
| 20-39           | 12,224                      | 16.7   | 3056                    | 16.7   | <0.001                          |
| 40-59           | 36,532                      | 50.0   | 9133                    | 50.0   | <0.001                          |
| ≥ 60            | 24,312                      | 33.3   | 6078                    | 33.3   | <0.001                          |
| Means (SD)      | 53.3                        | (14.2) | 53.6                    | (13.9) | 0.021                           |
| Comorbidity     |                             |        |                         |        |                                 |
| DM              | 8102                        | 11.1   | 2114                    | 11.6   | 0.015                           |
| Hyperlipidemia  | 14,078                      | 19.3   | 3439                    | 18.8   | 0.011                           |
| Hypertension    | 22,844                      | 31.3   | 5964                    | 32.7   | 0.030                           |
| Hyperthyroidism | 1089                        | 1.49   | 456                     | 2.50   | 0.072                           |
| IHD             | 10,993                      | 15.0   | 2941                    | 16.1   | 0.029                           |
| Stroke          | 2128                        | 2.91   | 483                     | 2.64   | 0.016                           |
| CKD             | 4821                        | 6.60   | 2061                    | 11.3   | 0.165                           |

Abbreviation: RA, rheumatoid arthritis; SD, standard deviation; DM, diabetes mellitus; IHD, ischemic heart disease; CKD, chronic kidney disease.



Table 2. Cox model measured hazard ratios and 95% confidence intervals of hearing loss associated with rheumatoid arthritis and covariates

| Variables                | Event no. | Person-years | IR   | HR (95% CI)      |                           |
|--------------------------|-----------|--------------|------|------------------|---------------------------|
|                          |           |              |      | Univariate       | Multivariate <sup>‡</sup> |
| RA                       |           |              |      |                  |                           |
| No                       | 927       | 572031       | 1.62 | 1.00             | 1.00                      |
| Yes                      | 429       | 139085       | 3.08 | 1.90 (1.70-2.13) | 1.89 (1.68-2.12)          |
| Sex                      |           |              |      |                  |                           |
| Female                   | 977       | 565205       | 1.73 | 1.00             | 1.00                      |
| Male                     | 379       | 145912       | 2.60 | 1.49 (1.33-1.68) | 1.39 (1.23-1.56)          |
| Age, years               |           |              |      |                  |                           |
| 20-39                    | 59        | 123836       | 0.48 | 1.00             | 1.00                      |
| 40-59                    | 563       | 368175       | 1.53 | 3.21 (2.45-4.19) | 2.72 (2.08-3.57)          |
| ≥ 60                     | 734       | 219105       | 3.35 | 6.98 (5.35-9.10) | 4.97 (3.77-6.56)          |
| Comorbidity <sup>†</sup> |           |              |      |                  |                           |
| No                       | 469       | 405253       | 1.16 | 1.00             | 1.00                      |
| Yes                      | 887       | 305864       | 2.90 | 2.49 (2.23-2.79) | 1.66 (1.47-1.87)          |

Abbreviation: IR, incidence rates per 1000 person-years; HR, hazard ratio; CI, confidence interval; RA, rheumatoid arthritis; DM, diabetes mellitus; IHD, ischemic heart disease; CKD, chronic kidney disease.

<sup>†</sup>Patients with DM, hyperlipidemia, hypertension, hyperthyroidism, IHD, stroke, and CKD dermatitis were classified as the comorbidity group.

<sup>‡</sup>Multivariate Cox proportional hazards regression model, including RA, sex, age, and comorbidity.

Table 3. Incidence rates and hazard ratios of hearing loss by sex, age, and comorbidity in the two cohorts

| Variables              | Non-RA cohort |              |      | RA cohort |              |      | RA cohort to non-RA cohort |                       |
|------------------------|---------------|--------------|------|-----------|--------------|------|----------------------------|-----------------------|
|                        | Event no.     | Person-years | IR   | Event no. | Person-years | IR   | HR (95% CI)                |                       |
|                        |               |              |      |           |              |      | Crude                      | Adjusted <sup>†</sup> |
| <b>Sex</b>             |               |              |      |           |              |      |                            |                       |
| Women                  | 663           | 454249       | 1.46 | 314       | 110956       | 2.83 | 1.94 (1.69-2.22)           | 1.96 (1.71-2.24)      |
| Men                    | 264           | 117782       | 2.24 | 115       | 28130        | 4.09 | 1.82 (1.46-2.27)           | 1.86 (1.49-2.32)      |
| <b>Age, years</b>      |               |              |      |           |              |      |                            |                       |
| 20-39                  | 40            | 98817        | 0.40 | 19        | 25020        | 0.76 | 1.89 (1.09-3.26)           | 1.91 (1.10-3.32)      |
| 40-59                  | 355           | 295193       | 1.20 | 208       | 72982        | 2.85 | 2.37 (2.00-2.81)           | 2.33 (1.96-2.76)      |
| ≥ 60                   | 532           | 178021       | 2.99 | 202       | 41084        | 4.92 | 1.63 (1.39-1.92)           | 1.63 (1.38-1.91)      |
| <b>Comorbidity</b>     |               |              |      |           |              |      |                            |                       |
| <b>DM</b>              |               |              |      |           |              |      |                            |                       |
| No                     | 765           | 514262       | 1.49 | 362       | 124722       | 2.90 | 1.95 (1.72-2.21)           | 1.95 (1.72-2.21)      |
| Yes                    | 162           | 57770        | 2.80 | 67        | 14363        | 4.66 | 1.66 (1.25-2.21)           | 1.75 (1.31-2.33)      |
| <b>Hyperlipidemia</b>  |               |              |      |           |              |      |                            |                       |
| No                     | 654           | 464753       | 1.41 | 320       | 113890       | 2.81 | 2.00 (1.75-2.28)           | 1.97 (1.72-2.25)      |
| Yes                    | 273           | 107279       | 2.54 | 109       | 25195        | 4.33 | 1.69 (1.36-2.11)           | 1.76 (1.41-2.20)      |
| <b>Hypertension</b>    |               |              |      |           |              |      |                            |                       |
| No                     | 481           | 402716       | 1.19 | 233       | 97031        | 2.40 | 2.01 (1.72-2.35)           | 1.97 (1.68-2.30)      |
| Yes                    | 446           | 169316       | 2.63 | 196       | 42054        | 4.66 | 1.76 (1.49-2.08)           | 1.82 (1.54-2.16)      |
| <b>Hyperthyroidism</b> |               |              |      |           |              |      |                            |                       |

|  |        |     |        |      |     |        |      |                  |                  |
|--|--------|-----|--------|------|-----|--------|------|------------------|------------------|
|  | No     | 909 | 563891 | 1.61 | 416 | 135733 | 3.06 | 1.90 (1.69-2.13) | 1.93 (1.72-2.17) |
|  | Yes    | 18  | 8140   | 2.21 | 13  | 3352   | 3.88 | 1.76 (0.86-3.58) | 1.76 (0.86-3.63) |
|  | IHD    |     |        |      |     |        |      |                  |                  |
|  | No     | 671 | 491566 | 1.37 | 316 | 118909 | 2.66 | 1.95 (1.70-2.23) | 1.98 (1.73-2.26) |
|  | Yes    | 256 | 80466  | 3.18 | 113 | 20176  | 5.60 | 1.75 (1.40-2.18) | 1.75 (1.40-2.19) |
|  | Stroke |     |        |      |     |        |      |                  |                  |
|  | No     | 896 | 559458 | 1.60 | 414 | 136197 | 3.04 | 1.90 (1.69-2.13) | 1.91 (1.70-2.15) |
|  | Yes    | 31  | 12573  | 2.47 | 15  | 2888   | 5.19 | 2.10 (1.13-3.89) | 2.16 (1.14-4.06) |
|  | CKD    |     |        |      |     |        |      |                  |                  |
|  | No     | 835 | 538065 | 1.55 | 369 | 124534 | 2.96 | 1.91 (1.69-2.16) | 1.95 (1.73-2.21) |
|  | Yes    | 92  | 33967  | 2.71 | 60  | 14551  | 4.12 | 1.53 (1.11-2.12) | 1.73 (1.24-2.41) |

Abbreviation: RA, rheumatoid arthritis; IR, incidence rates per 1000 person-years; HR, hazard ratio; CI, confidence interval.

<sup>†</sup> Model mutually adjusted for sex, age, DM, hyperlipidemia, hypertension, hyperthyroidism, IHD, stroke, and CKD in Cox proportional hazards regression.

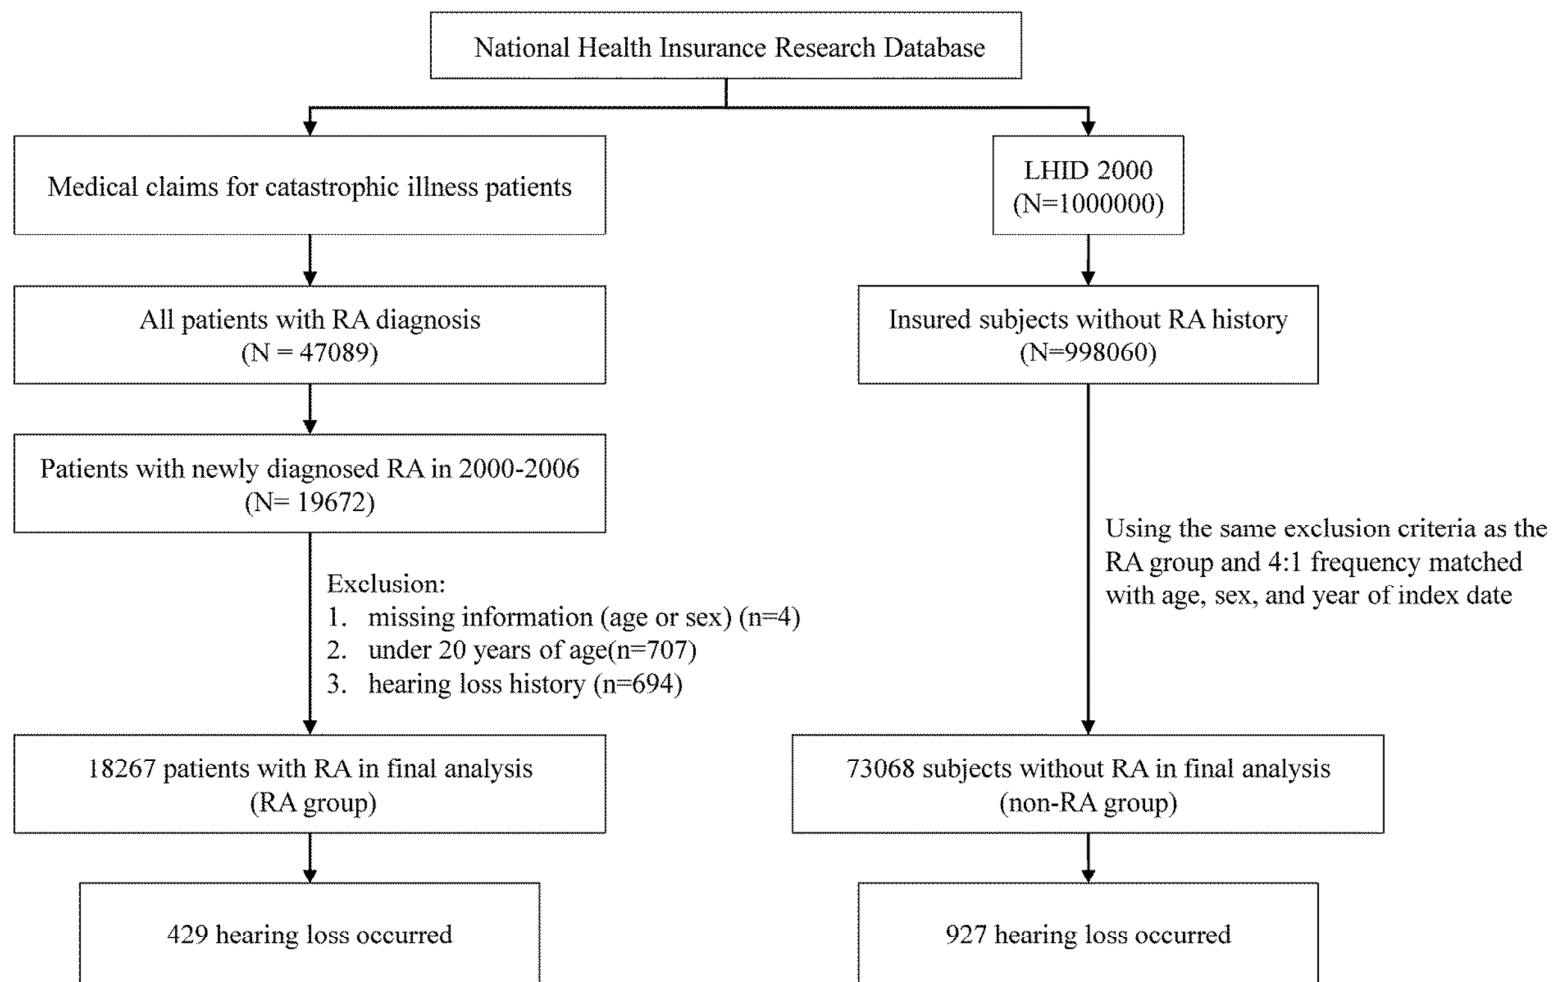

Fig 1. Flowchart showing selection of study cohorts

LHID, Longitudinal Health Insurance Database; RA, rheumatoid arthritis

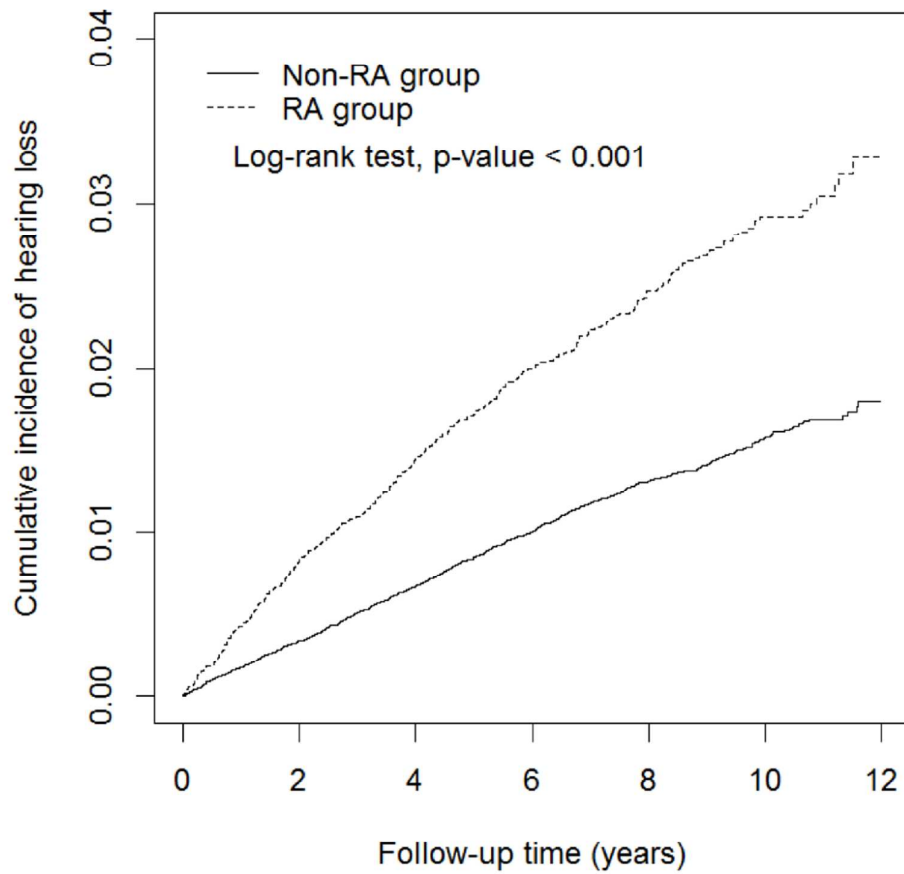

32 No. at risk

|                 |       |       |       |       |       |       |
|-----------------|-------|-------|-------|-------|-------|-------|
| 34 Non-RA group | 73068 | 70979 | 68952 | 56187 | 35795 | 16093 |
| 36 RA group     | 18267 | 17445 | 16643 | 13564 | 8541  | 3836  |

37  
38  
39  
40 Fig 2. Kaplan-Meier method estimated Cumulative incidence curves of hearing loss in  
41 the two cohorts  
42  
43 RA, rheumatoid arthritis  
44  
45  
46  
47  
48  
49  
50  
51  
52  
53  
54  
55  
56  
57  
58  
59  
60

**STROBE Statement**

## Checklist of items that should be included in reports of observational studies

| Section/Topic                                                                                      | Item No | Recommendation                                                                                                                                                                             | Reported on Page No |
|----------------------------------------------------------------------------------------------------|---------|--------------------------------------------------------------------------------------------------------------------------------------------------------------------------------------------|---------------------|
| <b>Title and abstract</b>                                                                          | 1       | (a) Indicate the study's design with a commonly used term in the title or the abstract                                                                                                     | 1,2                 |
|                                                                                                    |         | (b) Provide in the abstract an informative and balanced summary of what was done and what was found                                                                                        | 2,3                 |
| <b>Introduction</b>                                                                                |         |                                                                                                                                                                                            |                     |
| Background/rationale                                                                               | 2       | Explain the scientific background and rationale for the investigation being reported                                                                                                       | 5                   |
| Objectives                                                                                         | 3       | State specific objectives, including any prespecified hypotheses                                                                                                                           | 6                   |
| <b>Methods</b>                                                                                     |         |                                                                                                                                                                                            |                     |
| Study design                                                                                       | 4       | Present key elements of study design early in the paper                                                                                                                                    | 6                   |
| Setting                                                                                            | 5       | Describe the setting, locations, and relevant dates, including periods of recruitment, exposure, follow-up, and data collection                                                            | 6,7                 |
| Participants                                                                                       | 6       | (a) <i>Cohort study</i> —Give the eligibility criteria, and the sources and methods of selection of participants. Describe methods of follow-up                                            | 7,8                 |
|                                                                                                    |         | <i>Case-control study</i> —Give the eligibility criteria, and the sources and methods of case ascertainment and control selection. Give the rationale for the choice of cases and controls |                     |
|                                                                                                    |         | <i>Cross-sectional study</i> —Give the eligibility criteria, and the sources and methods of selection of participants                                                                      |                     |
| Variables                                                                                          | 7       | (b) <i>Cohort study</i> —For matched studies, give matching criteria and number of exposed and unexposed                                                                                   | 7,8                 |
|                                                                                                    |         | <i>Case-control study</i> —For matched studies, give matching criteria and the number of controls per case                                                                                 |                     |
| Data sources/measurement                                                                           | 8*      | Clearly define all outcomes, exposures, predictors, potential confounders, and effect modifiers. Give diagnostic criteria, if applicable                                                   | 8                   |
| Bias                                                                                               | 9       | For each variable of interest, give sources of data and details of methods of assessment (measurement). Describe comparability of assessment methods if there is more than one group       | 8                   |
| Study size                                                                                         | 10      | Describe any efforts to address potential sources of bias                                                                                                                                  | 8                   |
| Quantitative variables                                                                             | 11      | Explain how the study size was arrived at                                                                                                                                                  | 7,8                 |
| Statistical methods                                                                                | 12      | Explain how quantitative variables were handled in the analyses. If applicable, describe which groupings were chosen and why                                                               | 7,8                 |
|                                                                                                    |         | (a) Describe all statistical methods, including those used to control for confounding                                                                                                      | 8,9                 |
|                                                                                                    |         | (b) Describe any methods used to examine subgroups and interactions                                                                                                                        | 8,9                 |
|                                                                                                    |         | (c) Explain how missing data were addressed                                                                                                                                                | 26                  |
|                                                                                                    |         | (d) <i>Cohort study</i> —If applicable, explain how loss to follow-up was addressed                                                                                                        | 26                  |
| <i>Case-control study</i> —If applicable, explain how matching of cases and controls was addressed |         |                                                                                                                                                                                            |                     |
|                                                                                                    |         | <i>Cross-sectional study</i> —If applicable, describe analytical methods taking account of sampling strategy                                                                               | 9                   |
|                                                                                                    |         | (e) Describe any sensitivity analyses                                                                                                                                                      | 9                   |

| Section/Topic            | Item No | Recommendation                                                                                                                                                                                               | Reported on Page No |
|--------------------------|---------|--------------------------------------------------------------------------------------------------------------------------------------------------------------------------------------------------------------|---------------------|
| <b>Results</b>           |         |                                                                                                                                                                                                              |                     |
| Participants             | 13*     | (a) Report numbers of individuals at each stage of study—eg numbers potentially eligible, examined for eligibility, confirmed eligible, included in the study, completing follow-up, and analysed            | 10                  |
|                          |         | (b) Give reasons for non-participation at each stage                                                                                                                                                         | 26                  |
|                          |         | (c) Consider use of a flow diagram                                                                                                                                                                           | 26                  |
| Descriptive data         | 14*     | (a) Give characteristics of study participants (eg demographic, clinical, social) and information on exposures and potential confounders                                                                     | 10,22               |
|                          |         | (b) Indicate number of participants with missing data for each variable of interest                                                                                                                          | 26                  |
|                          |         | (c) <i>Cohort study</i> —Summarise follow-up time (eg, average and total amount)                                                                                                                             | 10,27               |
| Outcome data             | 15*     | <i>Cohort study</i> —Report numbers of outcome events or summary measures over time                                                                                                                          | 10,27               |
|                          |         | <i>Case-control study</i> —Report numbers in each exposure category, or summary measures of exposure                                                                                                         |                     |
|                          |         | <i>Cross-sectional study</i> —Report numbers of outcome events or summary measures                                                                                                                           |                     |
| Main results             | 16      | (a) Give unadjusted estimates and, if applicable, confounder-adjusted estimates and their precision (eg, 95% confidence interval). Make clear which confounders were adjusted for and why they were included | 10,23               |
|                          |         | (b) Report category boundaries when continuous variables were categorized                                                                                                                                    |                     |
|                          |         | (c) If relevant, consider translating estimates of relative risk into absolute risk for a meaningful time period                                                                                             |                     |
| Other analyses           | 17      | Report other analyses done—eg analyses of subgroups and interactions, and sensitivity analyses                                                                                                               | 10,11,24            |
| <b>Discussion</b>        |         |                                                                                                                                                                                                              |                     |
| Key results              | 18      | Summarise key results with reference to study objectives                                                                                                                                                     | 11                  |
| Limitations              | 19      | Discuss limitations of the study, taking into account sources of potential bias or imprecision. Discuss both direction and magnitude of any potential bias                                                   | 14                  |
| Interpretation           | 20      | Give a cautious overall interpretation of results considering objectives, limitations, multiplicity of analyses, results from similar studies, and other relevant evidence                                   | 11-14               |
| Generalisability         | 21      | Discuss the generalisability (external validity) of the study results                                                                                                                                        | 13,14               |
| <b>Other Information</b> |         |                                                                                                                                                                                                              |                     |
| Funding                  | 22      | Give the source of funding and the role of the funders for the present study and, if applicable, for the original study on which the present article is based                                                | 15                  |

\*Give information separately for cases and controls in case-control studies and, if applicable, for exposed and unexposed groups in cohort and cross-sectional studies.

**Note:** An Explanation and Elaboration article discusses each checklist item and gives methodological background and published examples of transparent reporting. The STROBE checklist is best used in conjunction with this article (freely available on the Web sites of PLoS Medicine at <http://www.plosmedicine.org/>, Annals of Internal Medicine at <http://www.annals.org/>, and Epidemiology at <http://www.epidem.com/>). Information on the STROBE Initiative is available at [www.strobe-statement.org](http://www.strobe-statement.org).

# BMJ Open

## Retrospective Cohort Study on Risk of Hearing Loss in Patients with Rheumatoid Arthritis Using Claims Data

|                                 |                                                                                                                                                    |
|---------------------------------|----------------------------------------------------------------------------------------------------------------------------------------------------|
| Journal:                        | <i>BMJ Open</i>                                                                                                                                    |
| Manuscript ID                   | bmjopen-2017-018134.R1                                                                                                                             |
| Article Type:                   | Research                                                                                                                                           |
| Date Submitted by the Author:   | 29-Aug-2017                                                                                                                                        |
| Complete List of Authors:       | Huang, Chung-Ming<br>Chen, Hsuan-Ju; China Medical University Hospital<br>Huang, Po-Hao<br>Tsay, Gregory J<br>Lan, Joung-Liang<br>Sung, Fung-Chang |
| <b>Primary Subject Heading</b>: | Rheumatology                                                                                                                                       |
| Secondary Subject Heading:      | Epidemiology, Ear, nose and throat/otolaryngology                                                                                                  |
| Keywords:                       | Rheumatoid arthritis, hearing loss, insurance data,, retrospective cohort study                                                                    |
|                                 |                                                                                                                                                    |

SCHOLARONE™  
Manuscripts



## Retrospective Cohort Study on Risk of Hearing Loss in

### Patients with Rheumatoid Arthritis Using Claims Data

Chung-Ming Huang<sup>1,2</sup>, Hsuan-Ju Chen<sup>3,4</sup>, Po-Hao Huang<sup>1</sup>, Gregory J Tsay<sup>1</sup>,  
Joung-Liang Lan<sup>1</sup>, Fung-Chang Sung<sup>3,5</sup>

**Running Title:** Hearing loss in rheumatoid arthritis

<sup>1</sup>Division of Immunology and Rheumatology, Department of Internal Medicine,  
China Medical University Hospital, Taichung, Taiwan;

<sup>2</sup>Graduate Institute of Integrated Medicine, College of Chinese Medicine, China  
Medical University, Taichung, Taiwan

<sup>3</sup>Management Office for Health Data, China Medical University Hospital, Taichung,  
Taiwan

<sup>4</sup>College of Medicine, China Medical University, Taichung, Taiwan

<sup>5</sup>Department of Health Services Administration, China Medical University, Taichung,  
Taiwan

Corresponding author:

Fung-Chang Sung, PhD, MPH  
Department of Health Services Administration, China Medical University  
91 Hsueh Shih Road  
Taichung 404, Taiwan  
Tel: 886-4-2205-4070  
Fax: 886-4-2233-9216  
E-mail: fcsung1008@yahoo.com

Word count: Abstract 247; Strength and limitation 145; Text 2603; 4 Tables; 2  
Figures.

## ABSTRACT

### **Purposes:**

Hearing loss (HL) has been reported as a manifestation of systemic vascular involvement in patients with an autoimmune disease. However, population studies on HL associated with rheumatoid arthritis (RA) are lacking. This study investigated the risk of developing HL in patients with RA using a nationwide population cohort.

### **Participants:**

We used the Taiwan National Health Insurance Research Database to identify 18,267 RA patients newly diagnosed in 2000-2006 and 73,068 controls without RA, frequency-matched by sex, age, and index year. We estimated HL incidences in both cohorts and the RA cohort to non-RA cohort hazard ratios (HRs) after adjusting for sex, age, and comorbidities by the end of 2011.

### **Findings to date:**

The HL incidence was higher in the RA cohort than in the non-RA cohort (3.08 versus 1.62 per 1000 person-years), with an adjusted HR of 1.91 (95% confidence interval = 1.70-2.14) for the RA cohort relative to the non-RA cohort after controlling for age, sex, and comorbidities. Men and the elderly are at a higher risk.

1  
2  
3  
4 Cardiovascular comorbidities were associated with a further increased HL risk for RA  
5  
6 patients. Medications were associated with reduced HL incidence; RA patients who  
7  
8 used NSAIDs had an aHR of 0.12 (95% CI = 0.07-0.20), compared with non-users.  
9  
10

11  
12  
13 **Conclusions:**  
14

15  
16  
17 This population-based retrospective cohort study demonstrates that patients with RA  
18  
19 are at an increased risk of developing HL. Adequate medications should be provided  
20  
21 to patients with RA diagnosed and scheduled auditory examinations should be  
22  
23 available to enable the early detection of HL.  
24  
25  
26

27  
28  
29 **Keywords:** Rheumatoid arthritis, hearing loss, insurance data, retrospective cohort  
30  
31 study  
32  
33  
34  
35  
36  
37  
38  
39  
40  
41  
42  
43  
44  
45  
46  
47  
48  
49  
50  
51  
52  
53  
54  
55  
56  
57  
58  
59  
60

### Strength and limitation of this study

1. The strength of this study is the use of a nationwide population-based cohort to identify HL risk in an Asian population with RA. Our findings can be generalized to the general population.
2. The inclusion of the Catastrophic Illness Patient Database confirmed the diagnoses of all RA cases with increased the reliability of our data; the large sample size reduced the tendency for selection bias, enhanced statistical power and precision of risk appraisal.
3. Some limitations in this study should be considered. Information on several suspected risk factors for HL, such as smoking and chronic exposure to occupational and environmental noise, which could be associated with HL in the general population, were not available in the insurance database.
4. Information on laboratory test results and HL severity, and on RA severity scale, such as disease activity, functional impairment and physical damage was also unavailable.

## Introduction

Rheumatoid arthritis (RA) is a disease predominantly characterized by chronic joint inflammation and is often accompanied by several peripheral inflammatory manifestations [1]. RA may lead to the destruction of the cartilage and bone due to chronic synovitis and may consequently impair joint function [2]. In addition, patients with RA may have extra-articular manifestations involving other organ systems [3], such as auditory system alteration, although with a different putative mechanism of damage [4–6]. With respect to the auditory system, previous studies have shown conflicting findings, in both types of hearing loss, and the RA disease activity and severity [7-10].

There are a wide variations in the reported prevalence of hearing loss in patients with RA. Sensorineural hearing loss (SNHL) is the most common hearing impairment in patients with RA, ranging from 25 to 72% [11], whereas conductive hearing loss and mixed hearing loss are less frequently reported [4,6,12]. SNHL could be induced by a direct immune response of either T or B cells against inner ear proteins [13].

Neurovascular inflammation and drugs used for RA treatment could also damage the cochlea [14]. Thus, hearing loss (HL) may be a manifestation of systemic vascular involvement in patients with RA and may have a significant effect on the health of patients with RA. However, the risk of developing HL in patients with RA has not

1  
2  
3  
4 been well examined using population data.  
5

6 Hence, the purpose of this study was to investigate the risk of HL in patients with  
7  
8  
9 RA, using representative insurance claims data obtained from the Taiwan National  
10  
11  
12 Health Insurance (NHI). The HL risk associated with other comorbidities, such as  
13  
14  
15 coronary heart disease, hypertension, stroke, diabetes, hyperlipidemia,  
16  
17  
18 hyperthyroidism, hypothyroidism, chronic renal disease and autoimmune diseases,  
19  
20  
21 were also evaluated.  
22  
23  
24  
25

## 26 **Materials and Methods**

### 27 **Data source**

28  
29  
30  
31 The Taiwan NHI system is a single-payer compulsory programme with a  
32  
33  
34 coverage of over 99% of 23.74 million people [15]. We conducted this study using  
35  
36  
37 two data sets: the Registry for Catastrophic Illness Patient Database (CIPD) and the  
38  
39  
40 Longitudinal Health Insurance Database (LHID2000), obtained from the Taiwan  
41  
42  
43 National Health Research Institutes. Patients with major diseases, such as cancer,  
44  
45  
46 chronic mental illness, end-stage renal disease and several autoimmune diseases  
47  
48  
49 requiring long-term care are eligible for the CIPD coverage for exemption from  
50  
51  
52 making co-payment. The LHID2000 contains the claims data of 1,000,000 people  
53  
54  
55 randomly sampled from all populations being registered in 2000 for the insurance  
56  
57  
58  
59  
60

1  
2  
3  
4 coverage. Reimbursement claims data for medical services from 1996 to 2011 in both  
5  
6 data sets were used in this study. For privacy protection, all personal identifications  
7  
8 were replaced with surrogate identifications suitable for public use and data linkage.  
9  
10  
11 The claims data contained information on the demographic status of the insured  
12  
13 people, dates of treatment and treatments received, diagnostic codes, prescriptions,  
14  
15 and costs. Diagnoses of diseases were coded with the International Classification of  
16  
17 Disease Diagnoses, 9th Revision of Clinical Modification (ICD-9-CM). Several  
18  
19 studies in Taiwan using the insurance claims data have demonstrated high accuracy  
20  
21 and validity of ICD-9 diagnosis [16-17]. This study was approved by the Research  
22  
23 Ethics Committee of China Medical University and Hospital (CMUH104-REC2-115).  
24  
25  
26  
27  
28  
29  
30

### 31 **Study population**

32  
33  
34 Figure 1 shows the flowchart for identifying and selecting study population using  
35  
36 a population-based retrospective cohort study design. We identified a RA cohort from  
37  
38 the registry for CIPD and a non-RA cohort from the LHID2000. Patients newly  
39  
40 diagnosed with RA (ICD-9-CM 714.0) from 2000 to 2006 and without HL were  
41  
42 included in the RA cohort. The date with RA certificated as the catastrophic illness  
43  
44 was considered as the index date for the approved patients. Patients who met four or  
45  
46 more of the diagnostic criteria based on the 1987 American College of Rheumatology  
47  
48 criteria were considered as having RA and those diagnosed by rheumatologists were  
49  
50  
51  
52  
53  
54  
55  
56  
57  
58  
59  
60

1  
2  
3 included in the RA cohort [18]. The application for catastrophic illness status was  
4  
5  
6 scrutinized by peer review.  
7

8  
9 For each patient with RA, four insured people without history of RA and HL  
10  
11 were randomly selected from the LHID2000 for the non-RA cohort and were  
12  
13 frequency-matched by sex, age (each 5-year span), and index year. Individuals with  
14  
15 missing information on age and/or sex or with history of HL (ICD-9-CM 388.2, 388.4,  
16  
17 389.00, 389.10, 389.12, 389.2, and 389.9) at baseline were excluded from the non-RA  
18  
19 cohort.  
20  
21  
22  
23  
24

25  
26 Both cohorts were followed from the index date to the date with HL diagnosed,  
27  
28 withdrawal from the NHI system, or the end of 2011. In general, HL was diagnosed  
29  
30 based on the audiometry test. To increase the validity of HL diagnosis, only patients  
31  
32 with three or more diagnoses in outpatient claims or an inpatient record were included  
33  
34 in the study. Patients who were suspected of having HL received comprehensive  
35  
36 examinations and, subsequently, treatment was followed when the disorder was  
37  
38 confirmed. In the insurance system, HL patients' medical reimbursement and  
39  
40 discharge notes are scrutinised by peer review. The insurance system also randomly  
41  
42 reviewed insurance claims to prevent errors and violations. Therefore, diagnoses and  
43  
44 codes of HL in the study were highly reliable. [16]  
45  
46  
47  
48  
49  
50  
51  
52

### 53 54 **Statistical analysis**

55  
56  
57  
58  
59  
60



1  
2  
3  
4 Distributions of sex and age (20-39, 40-59, and  $\geq 60$  years) and baseline  
5  
6 comorbidities, including diabetes (ICD-9-CM 250), hyperlipidemia (ICD-9-CM 272),  
7  
8 hypertension (ICD-9-CM 401-405), hyperthyroidism (ICD-9-CM 242), ischemic heart  
9  
10 disease (IHD; ICD-9-CM 410-414), stroke (ICD-9-CM 430-438), chronic kidney  
11  
12 disease (CKD; ICD-9-CM 580-589), hypothyroidism (ICD-9-CM 244), and  
13  
14 autoimmune diseases (including psoriasis [ICD-9-CM 696], systemic lupus  
15  
16 erythematosus [ICD-9-CM 710.0], systemic sclerosis [ICD-9-CM 710.1], Sjogren  
17  
18 syndrome [ICD-9-CM 710.2], dermatomyositis [ICD-9-CM 710.3], polymyositis  
19  
20 [ICD-9-CM 710.4], and vasculitis [ICD-9-CM 446.0, 446.2, 446.4, 446.5, 443.1,  
21  
22 446.7, 446.1, and 136.1]), between the RA and non-RA cohorts were compared. A  
23  
24 standardized mean difference of less than 0.1 was a negligible difference between two  
25  
26 means or two prevalence rates [19]. The incidence density of HL per 1000  
27  
28 person-years was calculated during the follow-up period by sex, age and comorbidity.  
29  
30 The Kaplan-Meier method was employed to plot the cumulative incidence of HL for  
31  
32 each cohort during the follow-up period, and the log-rank test was used to assess the  
33  
34 differences between the two curves. Univariate and multivariate Cox proportional  
35  
36 hazards regression analyses were used to measure the RA cohort to non-RA cohort  
37  
38 crude hazard ratio (cHR) and adjusted hazard ratio (aHR) of HL, respectively, and  
39  
40 their 95% confidence intervals (CIs). Sex, age, and comorbidities including diabetes,  
41  
42  
43  
44  
45  
46  
47  
48  
49  
50  
51  
52  
53  
54  
55  
56  
57  
58  
59  
60

1  
2  
3  
4 hyperlipidemia, hypertension, hyperthyroidism, hypothyroidism, IHD, stroke, CKD  
5  
6 and autoimmune diseases, were included as covariates in the multivariate Cox  
7  
8 regression analysis. To further assess the robustness of our results, we also evaluated  
9  
10 the association between RA and HL risk in various subgroups by sex, age, and each  
11  
12 comorbidity. We further evaluated the treatment effectiveness of medications for RA  
13  
14 patients by calculating the incidence density and HRs of HL. Medications that had  
15  
16 been prescribed for RA treatment during the follow-up period included Nonsteroidal  
17  
18 anti-inflammatory drugs (NSAIDs), prednisolone, disease-modifying antirheumatic  
19  
20 drugs (DMARDs, including hydroxychloroquine, sulfasalazine, methotrexate, and  
21  
22 leflunomide), and tumor necrosis factor (TNF, including etanercept and adalimumab).  
23  
24  
25  
26  
27  
28  
29  
30

31  
32 All analyses were conducted using SAS statistical software (version 9.4 for  
33  
34 Windows; SAS Institute, Cary, North Carolina, USA), and all statistical tests were  
35  
36 performed at the two-tailed significance level of 0.05.  
37  
38  
39  
40  
41  
42

### 43 **Results**

44  
45  
46 We identified 18,267 RA patients newly diagnosed from 2000 to 2006 for the  
47  
48 RA cohort and 73,068 persons without RA for the non-RA cohort as controls (Table  
49  
50 1). There were more women than men (78.4 vs. 21.6%) in both cohorts.  
51  
52  
53  
54 Approximately 66.7% of the study populations were <60 years old. Prevalence rates  
55  
56  
57  
58  
59  
60

1  
2  
3  
4 of CKD and autoimmune diseases were more prevalent in patients with RA than in  
5  
6 controls at the baseline.  
7

8  
9 The Kaplan-Meier method estimated cumulative incidence of HL was 1.5%  
10  
11 greater in the RA cohort than in the non-RA cohort (3.3 vs. 1.8%;  $p$  value < 0.001 in  
12  
13 the log-rank test) (Fig. 2). The incidence density of HL was approximately two-fold  
14  
15 greater in the RA cohort than in the non-RA cohort (3.08 vs. 1.62 per 1000  
16  
17 person-years), with an aHR of 1.91 (95% CI = 1.70-2.14) (Table 2). Men were at a  
18  
19 greater risk of HL than women, and the risk increased with age. Compared to 20–39  
20  
21 years old, the aHRs of HL were 2.89 (95% CI = 2.21-3.79) and 5.27 (95% CI =  
22  
23 3.99-6.95) for those aged 40-59 and those aged  $\geq 60$  years, respectively. The HL risk  
24  
25 for individuals with comorbidities was also elevated. Patients with hypertension and  
26  
27 IHD were significantly associated with higher risk of HL compared with their  
28  
29 counterparts without the disorder, with aHRs of 1.21 (95% CI = 1.07-1.38) and of  
30  
31 1.36 (95% CI = 1.19-1.56), respectively.  
32  
33  
34  
35  
36  
37  
38  
39  
40  
41  
42

43 Table 3 shows that incidence rates of HL stratified by sex, age, and comorbidity  
44  
45 were consistently greater in the RA cohort than in the non-RA cohort. Comorbidity  
46  
47 was associated with further increased HL risk for RA patients. RA patients with IHD  
48  
49 had the highest incident HL, 5.60 per 1000 person-years.  
50  
51  
52

53  
54 Table 4 shows that medications were associated with reduced incident HL for RA  
55  
56  
57  
58  
59  
60

1  
2  
3 patients. Near 99% of RA patients used NSAIDs and users had a HL incidence of 2.98  
4  
5  
6 per 1000 person-years, with an aHR of 0.12 (95% CI = 0.07-0.20) compared with  
7  
8  
9 non-users who had an incidence of 30.1 per 1000 person-years for HL. RA patients on  
10  
11 medications of TNF (n = 2706) had the lowest HL incidence of 1.17 per 1000  
12  
13 person-years with an aHR of 0.40 (95% CI = 0.27-0.59), compared with non-users  
14  
15 who had an incidence of 3.45 per 1000 person-years.  
16  
17  
18  
19  
20  
21  
22

## 23 Discussion

24  
25  
26 This retrospective cohort study showed that patients with RA were nearly two-fold  
27  
28 more likely to develop HL than those without RA. The risk of HL associated with RA  
29  
30 increased with age. In the RA cohort, those  $\geq 60$  years old had an HL incidence of 4.92  
31  
32 per 1000 person-years, which was 4.16 per 1000 person-year greater than that of  
33  
34 patients aged 20-39 years. The corresponding difference was 2.49 per 1000  
35  
36 person-years between the 2 age groups in the non-RA cohort, reflecting the natural HL  
37  
38 by aging in the non-RA cohort. Similar to reports in other studies, HL is age dependent  
39  
40 in patients and control subjects [6, 14, 20]. This finding is also consistent with previous  
41  
42 studies for patients with sudden sensorineural hearing loss comorbid with systemic  
43  
44 lupus erythematosus [21] and psoriasis [22]. The excess HL risk could be 50% in  
45  
46 patients with psoriasis.  
47  
48  
49  
50  
51  
52  
53  
54  
55  
56  
57  
58  
59  
60

1  
2  
3  
4 We also found that, in the RA cohort, men had an incidence of 4.09 per 1000  
5  
6 person-years for HL, which was 1.26 per 1000 person-years greater than women had.  
7  
8  
9 The corresponding difference was 0.78 per 1000 person-years in the non-RA cohort,  
10  
11 indicating the relationship between RA and HL risk may be slightly greater for men. In  
12  
13 the entire study population, the overall aHR was 1.40 for men compared with women  
14  
15 (Table 2). There is a remarkable imbalance between the number of males and females  
16  
17 with autoimmune diseases, with females representing the majority of cases. Although  
18  
19 reasons for this overrepresentation of women are unclear, genetic (X-linked) factors and  
20  
21 hormonal aspects are likely involved. Halligan et al. [23] investigated patients with RA  
22  
23 and also demonstrated that the prevalence of abnormal hearing is significantly greater  
24  
25 in males (86% or 12/14) than in females (33% or 5/15) ( $p = 0.008$ ). However, no  
26  
27 significant gender difference in HL among those without RA was found ( $p = 0.715$ ).  
28  
29  
30  
31  
32  
33  
34  
35  
36

37 Evidences have shown that patients with RA are prevalent with comorbidities, such  
38  
39 as IHD [24-26], stroke [27], hypertension [28,29], diabetes [30-32], dyslipidemia  
40  
41 [27,33], CKD [34,35] and thyroid disorders [36-38]. In this study, the study populations  
42  
43 in both cohorts were young. The baseline prevalence rates of most comorbidities  
44  
45 between the 2 cohorts were not significantly different, except that CKD and  
46  
47 autoimmune diseases were more prevalent in patients with RA than in controls without  
48  
49 RA at the baseline (Table 1). However, it is interest to note that most of the  
50  
51  
52  
53  
54  
55  
56  
57  
58  
59  
60

1  
2  
3  
4 comorbidities are associated with further increased incidence of HL, greater for the RA  
5  
6 cohort than for the non-RA cohort, except hypothyroidism, and autoimmune diseases  
7  
8  
9 (Table 3).  
10

11  
12 The development of RA and the breakdown of atherosclerotic plaques possibly  
13  
14 share common factors contributing to inflammatory cells and pro-inflammatory  
15  
16 cytokines [25]. Pro-inflammatory cytokines may contribute to the oxidative damage in  
17  
18 the inner ear [26]. For example, both tumor necrosis factor (TNF)- $\alpha$  and interleukin  
19  
20 (IL)-6 are involved in the pathogenesis of both RA and atherosclerosis [39]. However,  
21  
22 Takatsu et al. [6] showed that the pro-inflammatory cytokines (IL-6) and matrix  
23  
24 metalloproteinase (MMP) -3 may contribute to harm inner ear cells by an oxidative  
25  
26 process. Both RA and HL may have a shared mechanism associating with  
27  
28 cardiovascular diseases which account for the higher risk of hearing loss in patients  
29  
30 with RA. IHD alone may associate with HL. An earlier study found patients with IHD  
31  
32 are prevalent with HL for up to over 30% [40]. Moreover, in this study, we found that  
33  
34 patients with RA with IHD had the highest HL incidence among patients with  
35  
36 cardiovascular disorders. Hence, RA and cardiovascular disorders may have a shared  
37  
38 contribution to HL risk.  
39  
40  
41  
42  
43  
44  
45  
46  
47  
48  
49

50  
51 Furthermore, several studies [41,42] have reported elevated plasma renin and  
52  
53 angiotensin-converting enzyme (ACE) activities in patients with RA. Poor blood  
54  
55  
56  
57  
58  
59

1  
2  
3  
4 pressure control could induce changes in the renin-angiotensin system. Higher  
5  
6 oxidative stress in patients with RA could also impair the vasodilatory mechanism of  
7  
8 the endothelium [42], which could be associated with the higher HL risk in patients  
9  
10 with RA. Hence, hypertension is likely another risk factor contributing to HL. The  
11  
12 findings in our study further demonstrate the association between autoimmune disease  
13  
14 and HL risk.  
15  
16  
17  
18  
19

20  
21 After adjustment for sex, age, and comorbidity, we found reduced HL risk for  
22  
23 RA patients on medication of NSAID, prednisolone, DMARDs and TNF. Conversely,  
24  
25 Halligan et al. [23] described an association between HL and hydroxychloroquine, and  
26  
27 Dikici et al. [43] observed a dose relation between HL using methotrexate. On the other  
28  
29 hand, some studies found no relationship between HL and RA treatment using NSAID,  
30  
31 corticosteroid and DMARDs [6, 9, 20, 44]. The inconsistent results may be due to the  
32  
33 relatively small study sample sizes, while our study is a nationwide population-based  
34  
35 cohort with large sample size. It is likely, the reduced inflammation in patients with RA  
36  
37 on medications of NSAID, corticosteroid, DMARDs and TNF could be associated with  
38  
39 reduce the HL risk.  
40  
41  
42  
43  
44  
45  
46  
47  
48

49 The strength of this study is the use of a nationwide population-based cohort to  
50  
51 evaluate HL risk in an Asian population with RA. Our findings can be generalized to  
52  
53 the general population. The large sample size allowed the identification of risk factors  
54  
55  
56  
57  
58  
59  
60

1  
2  
3  
4 associated with the development of HL in Taiwan with a minimal tendency for  
5  
6 selection bias, and enhanced the statistical power and precision of risk appraisal. In  
7  
8 addition, the inclusion of the CIPD confirmed the diagnoses of all RA cases in the  
9  
10 NHIRD database, which increased the reliability of our data.  
11  
12  
13  
14

15 However, several limitations to the interpretation of our findings should be  
16  
17 considered. Information on several suspected risk factors for HL was unavailable, such  
18  
19 as smoking and chronic exposure to occupational and environmental noise, which could  
20  
21 be associated with HL for both cohorts. Moreover, information on laboratory test  
22  
23 results, HL severity, and RA severity scale and activity, functional impairment and  
24  
25 physical damage of the disease was also unavailable.  
26  
27  
28  
29  
30  
31

32 In conclusion, this study demonstrated that patients with RA are at an elevated  
33  
34 risk of developing HL. Our findings also suggest the need for prompt and early  
35  
36 detection of RA for HL prevention. Appropriate and timely medical interventions may  
37  
38 improve the prognosis of hearing loss for patients diagnosed with RA.  
39  
40  
41  
42  
43  
44  
45

#### 46 **Acknowledgments**

47  
48

49 We would like to thank the Taiwan Ministry of Health and Welfare Clinical Trial  
50  
51 and Research Center of Excellence (MOHW106-TDU-B-212-113004); China Medical  
52  
53 University Hospital; Academia Sinica Taiwan Biobank, Stroke Biosignature Project  
54  
55  
56  
57  
58  
59  
60



1  
2  
3  
4 (BM10601010036); Taiwan Clinical Trial Consortium for Stroke (MOST  
5  
6 106-2321-B-039-005); Tseng-Lien Lin Foundation, Taichung, Taiwan; Taiwan Brain  
7  
8  
9 Disease Foundation, Taipei, Taiwan; and Katsuzo and Kiyo Aoshima Memorial Funds,  
10  
11  
12 Japan, for their support.  
13

14  
15  
16  
17  
18 **Conflict of interest:** None.  
19

20  
21  
22  
23 **Footnotes:**

24  
25  
26 **Contributors:** C-MH and F-CS conceived and designed the study. C-MH wrote the  
27  
28 manuscript and revised the important intellectual content. Data were analyzed by F-CS  
29  
30 and H-JC. F-CS revised important intellectual content and was responsible for the final  
31  
32 version of the manuscript. Conception and design summary: C-MH, P-HH, GJT and  
33  
34 J-LL. All authors read and approved the final manuscript.  
35  
36  
37  
38

39  
40 **Competing interests:** None declared.  
41

42  
43 **Provenance and peer review:** Not commissioned; externally peer reviewed.  
44

45  
46 **Data sharing statement:** No additional data are available.  
47  
48  
49  
50  
51  
52  
53  
54  
55  
56  
57  
58  
59  
60

**References:**

1. Scott DL, Wolfe F, Huizinga TW. Rheumatoid arthritis. *Lancet* 2010;376:1094–1098.
2. Harris ED Jr. Rheumatoid arthritis: pathophysiology and implications for therapy. *N Engl J Med* 1990;322:1277-1289.
3. Ozcan M, Karakus MF, Gunduz OH, Tuncel U, Sahin H. Hearing loss and middle ear involvement in rheumatoid arthritis. *Rheumatol Int* 2002;22:16–19.
4. Murdin L, Patel S, Walmsley J, Yeoh LH. Hearing difficulties are common in patients with rheumatoid arthritis. *Clin Rheumatol* 2008;27:637–640.
5. Emamifar A, Bjoerndal K, Hansen IM. Is Hearing Impairment Associated with Rheumatoid Arthritis? A Review. *Open Rheumatol J.* 2016 Mar 15;10:26-32.
6. Takatsu M, Higaki M, Kinoshita H, Mizushima Y, Koizuka I. Ear involvement in patients with rheumatoid arthritis. *Otol Neurotol* 2005;26:755–761.
7. Yildirim A, Surucu G, Dogan S, Karabiber M. Relationship between disease activity and hearing impairment in patients with rheumatoid arthritis compared with controls. *Clin Rheumatol.* 2016;35:309-314.
8. Magaro M, Zoli A, Altomonte Z, Mirone L, Corvino G, Di Girolamo S, et al. Sensorineural hearing loss in rheumatoid arthritis. *Clin Exp Rheum* 1990;8:487–490.

- 1  
2  
3  
4 9. Lobo FS, Dossi MO, Batista L, Shinzato MM. Hearing impairment in patients with  
5  
6 rheumatoid arthritis: association with anti-citrullinated protein antibodies. Clin  
7  
8  
9 Rheumatol. 2016;35:2327-2332  
10
- 11  
12 10. Salvinelli F, Cancilleri F, Casale M, Luccarelli V, Di Peco V, D'Ascanio L, et al.  
13  
14  
15 Hearing thresholds in patients affected by rheumatoid arthritis. Clin Otolaryngol  
16  
17  
18 2014;29:75–79.  
19
- 20  
21 11. Pascual-Ramos V, Contreras-Yáñez I, Rivera-Hoyos P, Enríquez L,  
22  
23  
24  
25  
26  
27  
28  
29  
30  
31  
32  
33  
34  
35  
36  
37  
38  
39  
40  
41  
42  
43  
44  
45  
46  
47  
48  
49  
50  
51  
52  
53  
54  
55  
56  
57  
58  
59  
60  
Ramírez-Anguiano J. Cumulative disease activity predicts incidental hearing  
impairment in patients with rheumatoid arthritis (RA). Clin Rheumatol 2014;33:  
315–321.
12. Bayazit YA, Yilmaz M, Gunduz B, Altinyay S, Kemaloglu YK, Onder M, et al.  
Distortion product otoacoustic emission findings in Behçet's disease and  
rheumatoid arthritis. ORL J Otorhinolaryngol Relat Spec 2007;69:233–238.
13. Mijovic T, Zeitouni A, Colmegna I. Autoimmune sensorineural hearing loss: the  
otology-rheumatology interface. Rheumatology (Oxford) 2013;52:780–789.
14. Ozturk A, Yalcin S, Kaygusuz I, Sahin S, Gok U, Karlidag T, et al. High-frequency  
hearing loss and middle ear involvement in rheumatoid arthritis. Am J Otolaryngol  
2014;25:411–417.

- 1  
2  
3  
4 15. Cheng SH, Chen CC, Tsai SL. The impacts of DRG-based payments on health care  
5  
6 provider behaviors under a universal coverage system: a population-based study.  
7  
8 Health Policy 2012;107:202–208.  
9  
10  
11  
12 16. Cheng CL, Kao YH, Lin SJ, Lee CH, Lai ML. Validation of the National Health  
13  
14 Insurance Research Database with ischemic stroke cases in Taiwan.  
15  
16 Pharmacoepidemiol Drug Saf 2011;20:236–242.  
17  
18  
19  
20 17. Yu YB, Gau JP, Liu CY, Yang MH, Chiang SC, Hsu HC, et al. A nation-wide  
21  
22 analysis of venous thromboembolism in 497 180 cancer patients with the  
23  
24 development and validation of a risk-stratification scoring system. Thromb  
25  
26 Haemost 2012;108:225–235.  
27  
28  
29  
30  
31 18. Arnett FC, Edworthy SM, Bloch DA, McShane DJ, Fries JF, Cooper NS, et al. The  
32  
33 American Rheumatism Association 1987 revised criteria for the classification of  
34  
35 rheumatoid arthritis. Arthritis Rheum 1988;3:315–324.  
36  
37  
38  
39  
40 19. Mamdani M, Sykora K, Li P, Normand SL, Streiner DL, Austin PC, et al.  
41  
42 Reader's guide to critical appraisal of cohort studies: 2. Assessing potential for  
43  
44 confounding. BMJ 2005; 330: 960–962.  
45  
46  
47  
48 20. Pascual-Ramos V, Contreras-Yanez I, Enriquez L, Valdes S, Ramirez-Anguiano J  
49  
50 Hearing impairment in a tertiary-care- level population of Mexican rheumatoid  
51  
52 arthritis patients. J Clin Rheumatol 2012;18:393–398 .  
53  
54  
55  
56  
57  
58  
59  
60

- 1  
2  
3  
4 21. Lin C, Lin SW, Weng SF, Lin YS. Risk of sudden sensorineural hearing loss in  
5  
6 patients with systemic lupus erythematosus: a population-based cohort study.  
7  
8  
9 Audiol Neurootol 2013;18:95–100.  
10  
11  
12 22. Yen YC, Lin YS, Weng SF, Lai FJ. Risk of sudden sensorineural hearing loss in  
13  
14 patients with psoriasis: a retrospective cohort study. Am J Clin Dermatol  
15  
16  
17 2015;16:213–220.  
18  
19  
20 23. Halligan CS, Bauch CD, Brey RH, Achenbach SJ, Bamlet WR, McDonald TJ, et al.  
21  
22  
23 Hearing loss in rheumatoid arthritis. Laryngoscope 2006;116:2044–2049.  
24  
25  
26 24. Tanaka K, Hamada K, Nakayama T, Matsuda S, Atsumi A, Shimura T, et al. Risk  
27  
28 for cardiovascular disease in Japanese patients with rheumatoid arthritis: a  
29  
30 large-scale epidemiological study using a healthcare database. Springerplus. 2016  
31  
32 19;5:1111. doi: 10.1186/s40064-016-2800-6. eCollection 2016.  
33  
34  
35  
36  
37 25. Hansson GK. Inflammatory mechanisms in atherosclerosis. J Thromb Haemost  
38  
39  
40 2009;7(Suppl 1):328–331.  
41  
42  
43 26. Evans P, Halliwell B. Free radicals and hearing. Cause, consequence, and criteria.  
44  
45  
46 Ann N Y Acad Sci 1999;888:19–40.  
47  
48  
49 27. Semb AG, Kvien TK, Aastveit AH, Jungner I, Pedersen TR, Walldius G, et al.  
50  
51  
52 Lipids, myocardial infarction and ischaemic stroke in patients with rheumatoid  
53  
54  
55  
56  
57  
58  
59  
60

- 1  
2  
3  
4 arthritis in the Apolipoprotein-related Mortality RISK (AMORIS) Study. *Ann*  
5  
6 *Rheum Dis* 2010;69:1996–2001.  
7  
8  
9 28. Boyer JF, Gourraud PA, Cantagrel A, Davignon JL, Constantin A. Traditional  
10  
11 cardiovascular risk factors in rheumatoid arthritis: a meta-analysis. *Joint Bone*  
12  
13 *Spine* 2011;78:179–183.  
14  
15  
16  
17 29. Protogerou, AD, Panagiotakos DB, Zampeli E, Argyris AA, Arida K,  
18  
19 Konstantonis GD, et al. Arterial hypertension assessed “out of office” in a  
20  
21 contemporary cohort of rheumatoid arthritis patients free of cardiovascular disease  
22  
23 is characterized by high prevalence, low awareness, poor control and increased  
24  
25  
26  
27  
28  
29  
30  
31  
32  
33  
34  
35  
36  
37  
38  
39  
40  
41  
42  
43  
44  
45  
46  
47  
48  
49  
50  
51  
52  
53  
54  
55  
56  
57  
58  
59  
60
- vascular damage-associated “white coat” phenomenon. *Arthritis Res Ther* 2013;15:  
R142. doi: 10.1186/ar4324.
30. Chung CP, Oeser A, Solus JF, Gebretsadik T, Shintani A, Avalos I, et al.  
Inflammation-associated insulin resistance: differential effects in rheumatoid  
arthritis and systemic lupus erythematosus define potential mechanisms. *Arthritis*  
*Rheum* 2008;58:2105–2112.
31. Giles JT, Danielides S, Szklo M, Post WS, Blumenthal RS, Petri M, et al. Insulin  
resistance in rheumatoid arthritis: disease-related indicators and associations with  
the presence and progression of subclinical atherosclerosis. *Arthritis Rheumatol*  
2015;67:626–636.

- 1  
2  
3  
4 32. Dessein PH, Joffe BI, Stanwix AE. Inflammation, insulin resistance, and aberrant  
5  
6 lipid metabolism as cardiovascular risk factors in rheumatoid arthritis. *J*  
7  
8  
9 *Rheumatol* 2003;30:1403–1405.  
10  
11  
12 33. Kavanaugh A. Dyslipoproteinaemia in a subset of patients with rheumatoid  
13  
14  
15 arthritis. *Ann Rheum Dis* 1994;53:551–552.  
16  
17  
18 34. Kochi M, Kohagura K, Shiohira Y, Iseki K, Ohya Y. Inflammation as a Risk of  
19  
20  
21 Developing Chronic Kidney Disease in Rheumatoid Arthritis. *PLoS One* 2016  
22  
23 18;11(8). e0160225. doi: 10.1371/journal.pone.0160225. eCollection 2016.  
24  
25  
26 35. Chiu HY, Huang HL, Li CH, Chen HA, Yeh CL, Chiu SH, et.al. Increased Risk of  
27  
28  
29 Chronic Kidney Disease in Rheumatoid Arthritis Associated with Cardiovascular  
30  
31  
32 Complications - A National Population-Based Cohort Study. *PLoS One* 2015;  
33  
34 10(9):e0136508. doi: 10.1371/journal.pone.0136508. eCollection 2015.  
35  
36  
37 36. Pan XF, Gu JQ, Shan ZY. Increased risk of thyroid autoimmunity in rheumatoid  
38  
39  
40 arthritis: a systematic review and meta-analysis. *Endocrine* 2015;50:79–86.  
41  
42  
43 37. Joshi P, Agarwal A, Vyas S, Kumar R. Prevalence of hypothyroidism in  
44  
45  
46 rheumatoid arthritis and its correlation with disease activity. *Trop Doct*  
47  
48 2017;47:6-10.  
49  
50  
51 38. Bourji K, Gatto M, Cozzi F, Doria A, Punzi L. Rheumatic and autoimmune thyroid  
52  
53  
54 disorders: a causal or casual relationship? *Autoimmun Rev* 2015;14:57-63.  
55  
56  
57  
58  
59  
60

- 1  
2  
3  
4 39. Libby P. Role of inflammation in atherosclerosis associated with rheumatoid  
5  
6 arthritis. *Am J Med* 2008;121:S21–31.  
7  
8  
9 40. Susmano A, Rosenbush SW. Hearing loss and ischemic heart disease. *Am J Otol*  
10 1988;9:403-408.  
11  
12 41. Samoriadova OS, Zharova EA, Masenko VP, Balabanova RM, Vil'chinskaia MIu,  
13  
14 Nasonov EL. The renin-angiotensin-aldosterone system and arterial hypertension in  
15  
16 patients with rheumatoid arthritis. *Klin Med (Mosk)*. 1991;69:69–71.  
17  
18  
19  
20 42. Sakuta T, Morita Y, Satoh M, Fox DA, Kashihara N. Involvement of the  
21  
22 renin-angiotensin system in the development of vascular damage in a rat model of  
23  
24 arthritis: effect of angiotensin receptor blockers. *Arthritis Rheum* 2010;62:1319–  
25  
26 1328.  
27  
28  
29  
30  
31 43. Dikici O, Muluk NB, Tosun AK, Unlusoy I. Subjective audiological tests and  
32  
33 transient evoked otoacoustic emissions in patients with rheumatoid arthritis:  
34  
35 analysis of the factors affecting hearing levels. *Eur Arch Otorhinolaryngol*  
36  
37 2009;266:1719–1726.  
38  
39  
40  
41  
42 44. Kastanioudakis I, Skevas A, Danielidis V, Tsiakou E, Drosos AA, Moustopoulos  
43  
44 MH. Inner ear involvement in rheumatoid arthritis: a prospective clinical study. *The*  
45  
46 *Journal of laryngology and otology* 1995;109:713–718.  
47  
48  
49  
50  
51  
52  
53  
54  
55  
56  
57  
58  
59  
60



Table 1. Distribution of demographic factors and comorbidity compared between cohorts

| Variable                         | Non-RA cohort<br>N = 73,068 |        | RA cohort<br>N = 18,267 |        | Standardized mean<br>difference |
|----------------------------------|-----------------------------|--------|-------------------------|--------|---------------------------------|
|                                  | n                           | %      | n                       | %      |                                 |
| Sex                              |                             |        |                         |        |                                 |
| Female                           | 57288                       | 78.4   | 14322                   | 78.4   | <0.001                          |
| Male                             | 15780                       | 21.6   | 3945                    | 21.6   | <0.001                          |
| Age, years                       |                             |        |                         |        |                                 |
| 20-39                            | 12224                       | 16.7   | 3056                    | 16.7   | <0.001                          |
| 40-59                            | 36532                       | 50.0   | 9133                    | 50.0   | <0.001                          |
| ≥ 60                             | 24312                       | 33.3   | 6078                    | 33.3   | <0.001                          |
| Means (SD)                       | 53.3                        | (14.2) | 53.6                    | (13.9) | 0.021                           |
| Comorbidity                      |                             |        |                         |        |                                 |
| DM                               | 8102                        | 11.1   | 2114                    | 11.6   | 0.015                           |
| Hyperlipidemia                   | 14078                       | 19.3   | 3439                    | 18.8   | 0.011                           |
| Hypertension                     | 22844                       | 31.3   | 5964                    | 32.7   | 0.030                           |
| Hyperthyroidism                  | 1089                        | 1.49   | 456                     | 2.50   | 0.072                           |
| IHD                              | 10993                       | 15.0   | 2941                    | 16.1   | 0.029                           |
| Stroke                           | 2128                        | 2.91   | 483                     | 2.64   | 0.016                           |
| CKD                              | 4821                        | 6.60   | 2061                    | 11.3   | 0.165                           |
| Hypothyroidism                   | 407                         | 0.56   | 216                     | 1.18   | 0.067                           |
| Autoimmune diseases <sup>†</sup> | 433                         | 0.59   | 534                     | 2.92   | 0.178                           |

Abbreviation: RA, rheumatoid arthritis; SD, standard deviation; DM, diabetes mellitus; IHD, ischemic heart disease; CKD, chronic kidney disease.

<sup>†</sup>Autoimmune diseases including psoriasis, SLE, systemic sclerosis, Sjogren syndrome, dermatomyositis, polymyositis, and vasculitis.

Table 2. Cox model measured hazard ratios and 95% confidence intervals of hearing loss associated with rheumatoid arthritis and covariates

| Variables       | Event<br>n | Person-years | Incidence<br>density <sup>#</sup> | HR (95% CI)      |                           |
|-----------------|------------|--------------|-----------------------------------|------------------|---------------------------|
|                 |            |              |                                   | Univariate       | Multivariate <sup>‡</sup> |
| RA              |            |              |                                   |                  |                           |
| No              | 927        | 572031       | 1.62                              | ref              | ref                       |
| Yes             | 429        | 139085       | 3.08                              | 1.90 (1.70-2.13) | 1.91 (1.70-2.14)          |
| Sex             |            |              |                                   |                  |                           |
| Female          | 977        | 565205       | 1.73                              | ref              | ref                       |
| Male            | 379        | 145912       | 2.60                              | 1.49 (1.33-1.68) | 1.40 (1.24-1.58)          |
| Age, years      |            |              |                                   |                  |                           |
| 20-39           | 59         | 123836       | 0.48                              | ref              | ref                       |
| 40-59           | 563        | 368175       | 1.53                              | 3.21 (2.45-4.19) | 2.89 (2.21-3.79)          |
| ≥ 60            | 734        | 219105       | 3.35                              | 6.98 (5.35-9.10) | 5.27 (3.99-6.95)          |
| Comorbidity     |            |              |                                   |                  |                           |
| DM              |            |              |                                   |                  |                           |
| No              | 1127       | 638984       | 1.76                              | ref              | ref                       |
| Yes             | 229        | 72133        | 3.17                              | 1.78 (1.55-2.06) | 1.14 (0.98-1.33)          |
| Hyperlipidemia  |            |              |                                   |                  |                           |
| No              | 974        | 578643       | 1.68                              | ref              | ref                       |
| Yes             | 382        | 132474       | 2.88                              | 1.70 (1.51-1.92) | 1.10 (0.97-1.26)          |
| Hypertension    |            |              |                                   |                  |                           |
| No              | 714        | 499747       | 1.43                              | ref              | ref                       |
| Yes             | 642        | 211370       | 3.04                              | 2.11 (1.90-2.35) | 1.21 (1.07-1.38)          |
| Hyperthyroidism |            |              |                                   |                  |                           |
| No              | 1325       | 699624       | 1.89                              | ref              | ref                       |
| Yes             | 31         | 11492        | 2.70                              | 1.41 (0.99-2.02) | 1.33 (0.92-1.92)          |
| IHD             |            |              |                                   |                  |                           |
| No              | 987        | 610475       | 1.62                              | ref              | ref                       |
| Yes             | 369        | 100642       | 3.67                              | 2.25 (2.00-2.54) | 1.36 (1.19-1.56)          |
| Stroke          |            |              |                                   |                  |                           |
| No              | 1310       | 695656       | 1.88                              | ref              | ref                       |
| Yes             | 46         | 15461        | 2.98                              | 1.55 (1.15-2.07) | 0.85 (0.63-1.14)          |
| CKD             |            |              |                                   |                  |                           |
| No              | 1204       | 662599       | 1.82                              | ref              | ref                       |
| Yes             | 152        | 48517        | 3.13                              | 1.71 (1.45-2.03) | 1.06 (0.89-1.26)          |
| Hypothyroidism  |            |              |                                   |                  |                           |
| No              | 1343       | 706448       | 1.90                              | ref              | ref                       |

|                                  |      |        |      |                  |                  |
|----------------------------------|------|--------|------|------------------|------------------|
| Yes                              | 13   | 4668   | 2.78 | 1.46 (0.85-2.52) | 1.15 (0.65-2.01) |
| Autoimmune diseases <sup>†</sup> |      |        |      |                  |                  |
| No                               | 1334 | 704142 | 1.89 | ref              | ref              |
| Yes                              | 22   | 6975   | 3.15 | 1.65 (1.08-2.51) | 1.34 (0.88-2.05) |

Abbreviation: HR, hazard ratio; CI, confidence interval; RA, rheumatoid arthritis; DM, diabetes mellitus; IHD, ischemic heart disease; CKD, chronic kidney disease.

<sup>†</sup>Autoimmune diseases including psoriasis, SLE, systemic sclerosis, Sjogren syndrome, dermatomyositis, polymyositis, and vasculitis.

# per 1000 person-years

<sup>‡</sup>Multivariate Cox proportional hazards regression model, including RA, sex, age (categorical), DM, hyperlipidemia, hypertension, hyperthyroidism, IHD, stroke, CKD, hypothyroidism, and autoimmune diseases.

Table 3. Incidence density and RA cohort to non-RA cohort hazard ratios of hearing loss by sex, age, and comorbidity in the two cohorts

| Variables      | Non-RA cohort |              |                                | RA cohort |              |                                | RA cohort to non-RA cohort |                       |
|----------------|---------------|--------------|--------------------------------|-----------|--------------|--------------------------------|----------------------------|-----------------------|
|                | Event no.     | Person-years | Incidence density <sup>#</sup> | Event no. | Person-years | Incidence density <sup>#</sup> | Crude                      | Adjusted <sup>‡</sup> |
| Sex            |               |              |                                |           |              |                                |                            |                       |
| Women          | 663           | 454249       | 1.46                           | 314       | 110956       | 2.83                           | 1.94 (1.69-2.22)           | 1.95 (1.70-2.23)      |
| Men            | 264           | 117782       | 2.24                           | 115       | 28130        | 4.09                           | 1.82 (1.46-2.27)           | 1.85 (1.48-2.30)      |
| Age, years     |               |              |                                |           |              |                                |                            |                       |
| 20-39          | 40            | 98817        | 0.40                           | 19        | 25020        | 0.76                           | 1.89 (1.09-3.26)           | 1.80 (1.02-3.16)      |
| 40-59          | 355           | 295193       | 1.20                           | 208       | 72982        | 2.85                           | 2.37 (2.00-2.81)           | 2.32 (1.95-2.76)      |
| ≥ 60           | 532           | 178021       | 2.99                           | 202       | 41084        | 4.92                           | 1.63 (1.39-1.92)           | 1.62 (1.37-1.90)      |
| Comorbidity    |               |              |                                |           |              |                                |                            |                       |
| DM             |               |              |                                |           |              |                                |                            |                       |
| No             | 765           | 514262       | 1.49                           | 362       | 124722       | 2.90                           | 1.95 (1.72-2.21)           | 1.94 (1.71-2.20)      |
| Yes            | 162           | 57770        | 2.80                           | 67        | 14363        | 4.66                           | 1.66 (1.25-2.21)           | 1.74 (1.30-2.32)      |
| Hyperlipidemia |               |              |                                |           |              |                                |                            |                       |
| No             | 654           | 464753       | 1.41                           | 320       | 113890       | 2.81                           | 2.00 (1.75-2.28)           | 1.96 (1.72-2.25)      |
| Yes            | 273           | 107279       | 2.54                           | 109       | 25195        | 4.33                           | 1.69 (1.36-2.11)           | 1.74 (1.39-2.18)      |
| Hypertension   |               |              |                                |           |              |                                |                            |                       |
| No             | 481           | 402716       | 1.19                           | 233       | 97031        | 2.40                           | 2.01 (1.72-2.35)           | 1.94 (1.66-2.28)      |
| Yes            | 446           | 169316       | 2.63                           | 196       | 42054        | 4.66                           | 1.76 (1.49-2.08)           | 1.82 (1.54-2.16)      |

|    |                                  |     |        |      |     |        |      |                  |                  |
|----|----------------------------------|-----|--------|------|-----|--------|------|------------------|------------------|
| 1  |                                  |     |        |      |     |        |      |                  |                  |
| 2  |                                  |     |        |      |     |        |      |                  |                  |
| 3  |                                  |     |        |      |     |        |      |                  |                  |
| 4  |                                  |     |        |      |     |        |      |                  |                  |
| 5  |                                  |     |        |      |     |        |      |                  |                  |
| 6  |                                  |     |        |      |     |        |      |                  |                  |
| 7  | Hyperthyroidism                  |     |        |      |     |        |      |                  |                  |
| 8  | No                               | 909 | 563891 | 1.61 | 416 | 135733 | 3.06 | 1.90 (1.69-2.13) | 1.92 (1.71-2.16) |
| 9  | Yes                              | 18  | 8140   | 2.21 | 13  | 3352   | 3.88 | 1.76 (0.86-3.58) | 1.72 (0.84-3.55) |
| 10 |                                  |     |        |      |     |        |      |                  |                  |
| 11 | IHD                              |     |        |      |     |        |      |                  |                  |
| 12 | No                               | 671 | 491566 | 1.37 | 316 | 118909 | 2.66 | 1.95 (1.70-2.23) | 1.96 (1.71-2.24) |
| 13 | Yes                              | 256 | 80466  | 3.18 | 113 | 20176  | 5.60 | 1.75 (1.40-2.18) | 1.75 (1.40-2.19) |
| 14 |                                  |     |        |      |     |        |      |                  |                  |
| 15 | Stroke                           |     |        |      |     |        |      |                  |                  |
| 16 | No                               | 896 | 559458 | 1.60 | 414 | 136197 | 3.04 | 1.90 (1.69-2.13) | 1.90 (1.69-2.14) |
| 17 | Yes                              | 31  | 12573  | 2.47 | 15  | 2888   | 5.19 | 2.10 (1.13-3.89) | 2.18 (1.16-4.12) |
| 18 |                                  |     |        |      |     |        |      |                  |                  |
| 19 | CKD                              |     |        |      |     |        |      |                  |                  |
| 20 | No                               | 835 | 538065 | 1.55 | 369 | 124534 | 2.96 | 1.91 (1.69-2.16) | 1.94 (1.71-2.19) |
| 21 | Yes                              | 92  | 33967  | 2.71 | 60  | 14551  | 4.12 | 1.53 (1.11-2.12) | 1.73 (1.25-2.42) |
| 22 |                                  |     |        |      |     |        |      |                  |                  |
| 23 | Hypothyroidism                   |     |        |      |     |        |      |                  |                  |
| 24 | No                               | 917 | 569055 | 1.61 | 426 | 137393 | 3.10 | 1.92 (1.71-2.16) | 1.94 (1.73-2.18) |
| 25 | Yes                              | 10  | 2977   | 3.36 | 3   | 1692   | 1.77 | 0.53 (0.15-1.93) | 0.69 (0.19-2.57) |
| 26 |                                  |     |        |      |     |        |      |                  |                  |
| 27 | Autoimmune diseases <sup>†</sup> |     |        |      |     |        |      |                  |                  |
| 28 | No                               | 916 | 568956 | 1.61 | 418 | 135186 | 3.09 | 1.92 (1.71-2.15) | 1.94 (1.73-2.18) |
| 29 | Yes                              | 11  | 3076   | 3.58 | 11  | 3899   | 2.82 | 0.79 (0.34-1.82) | 0.89 (0.38-2.07) |
| 30 |                                  |     |        |      |     |        |      |                  |                  |
| 31 |                                  |     |        |      |     |        |      |                  |                  |

Abbreviation: RA, rheumatoid arthritis; HR, hazard ratio; CI, confidence interval; DM, diabetes mellitus; IHD, ischemic heart disease; CKD, chronic kidney disease.

<sup>†</sup>Autoimmune diseases including psoriasis, SLE, systemic sclerosis, Sjogren syndrome, dermatomyositis, polymyositis, and vasculitis.

<sup>#</sup> per 1000 person-years.

<sup>‡</sup> Model mutually adjusted for sex, age (continuous), DM, hyperlipidemia, hypertension, hyperthyroidism, IHD, stroke, CKD,

1  
2  
3  
4  
5  
6  
7 hypothyroidism, and autoimmune diseases.  
8  
9  
10  
11  
12  
13  
14  
15  
16  
17  
18  
19  
20  
21  
22  
23  
24  
25  
26  
27  
28  
29  
30  
31  
32  
33  
34  
35  
36  
37  
38  
39  
40  
41  
42  
43  
44  
45  
46  
47

---

For peer review only

Table 4. Incidence density and hazard ratios of hearing loss associated with medication in patients with rheumatoid arthritis

| Medicine use        | N     | Event no. | Person-years | Incidence density <sup>#</sup> | HR (95% CI)      |                           |
|---------------------|-------|-----------|--------------|--------------------------------|------------------|---------------------------|
|                     |       |           |              |                                | Crude            | Adjusted <sup>&amp;</sup> |
| NSAIDs              |       |           |              |                                |                  |                           |
| No                  | 169   | 16        | 532          | 30.1                           | ref              | ref                       |
| Yes                 | 18098 | 413       | 138553       | 2.98                           | 0.11 (0.07-0.18) | 0.12 (0.07-0.20)          |
| Prednisolone        |       |           |              |                                |                  |                           |
| No                  | 1673  | 60        | 11529        | 5.20                           | ref              | ref                       |
| Yes                 | 16594 | 369       | 127556       | 2.89                           | 0.56 (0.43-0.74) | 0.53 (0.40-0.70)          |
| DMARDs <sup>†</sup> |       |           |              |                                |                  |                           |
| No                  | 2723  | 90        | 18643        | 4.83                           | ref              | ref                       |
| Yes                 | 15544 | 339       | 120443       | 2.81                           | 0.59 (0.47-0.74) | 0.68 (0.53-0.85)          |
| TNF <sup>‡</sup>    |       |           |              |                                |                  |                           |
| No                  | 15561 | 403       | 116876       | 3.45                           | ref              | ref                       |
| Yes                 | 2706  | 26        | 22210        | 1.17                           | 0.34 (0.23-0.51) | 0.40 (0.27-0.59)          |

Abbreviation: HR, hazard ratio; CI, confidence interval RA, rheumatoid arthritis; NSAID, non-steroidal anti-inflammatory drug; DMARDs, disease-modifying antirheumatic drugs; TNF, tumor necrosis factor.

<sup>†</sup> DMARDs including hydroxychloroquine, sulfasalazine, methotrexate, and leflunomide.

<sup>‡</sup> TNF including etanercept and adalimumab.

<sup>#</sup> per 1000 person-years.

<sup>&</sup> Model adjusted for sex, age, DM, hyperlipidemia, hypertension, hyperthyroidism, IHD, stroke, CKD, hypothyroidism, and autoimmune diseases.

1  
2  
3  
4  
5  
6  
7 Fig 1. Flowchart showing selection of study cohorts  
8 LHID, Longitudinal Health Insurance Database; RA, rheumatoid arthritis  
9  
10  
11  
12  
13  
14  
15  
16  
17  
18  
19  
20  
21  
22  
23  
24  
25  
26  
27  
28  
29  
30  
31  
32  
33  
34  
35  
36  
37  
38  
39  
40  
41  
42  
43  
44  
45  
46  
47

For peer review only



1  
2  
3  
4  
5  
6  
7  
8  
9  
10  
11  
12  
13  
14  
15  
16  
17  
18  
19  
20  
21  
22  
23  
24  
25  
26  
27  
28  
29  
30  
31  
32  
33  
34  
35  
36  
37  
38  
39  
40  
41  
42  
43  
44  
45  
46  
47  
48  
49  
50  
51  
52  
53  
54  
55  
56  
57  
58  
59  
60

Fig 2. Kaplan-Meier method estimated Cumulative incidence curves of hearing loss in the two cohorts  
RA, rheumatoid arthritis

For peer review only

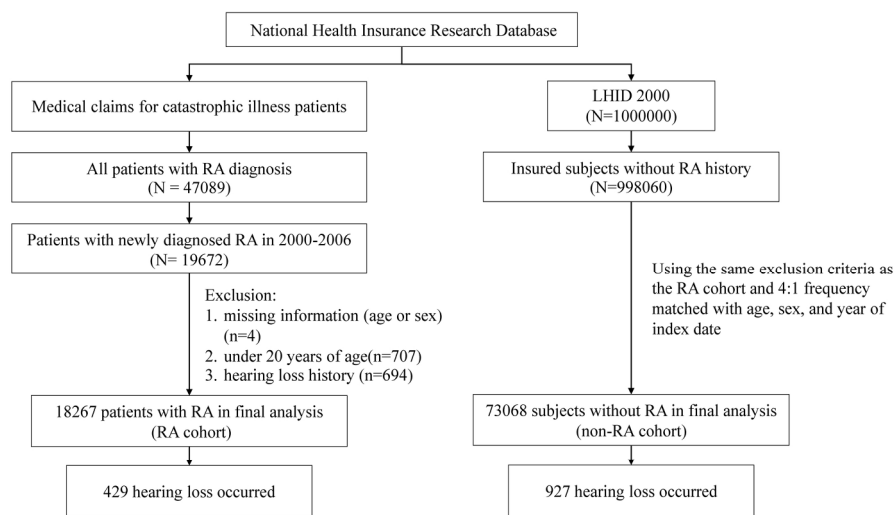

190x107mm (300 x 300 DPI)

Review only

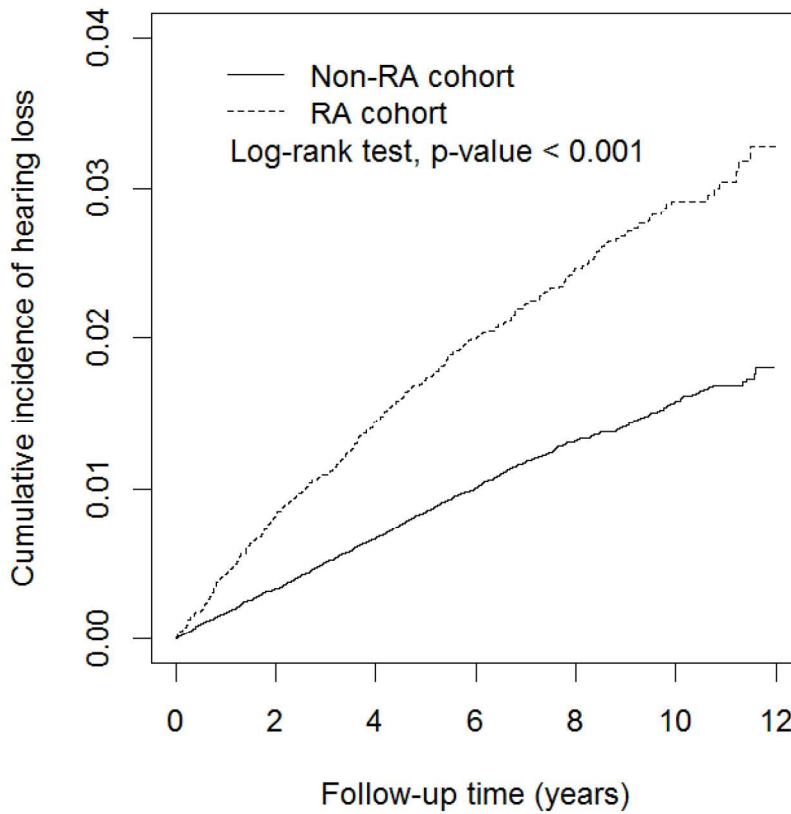

No. at risk

|               |       |       |       |       |       |       |
|---------------|-------|-------|-------|-------|-------|-------|
| Non-RA cohort | 73068 | 70979 | 68952 | 56187 | 35795 | 16093 |
| RA cohort     | 18267 | 17445 | 16643 | 13564 | 8541  | 3836  |

199x209mm (300 x 300 DPI)

**STROBE Statement**

## Checklist of items that should be included in reports of observational studies

| Section/Topic                                                                                      | Item No | Recommendation                                                                                                                                                                             | Reported on Page No |
|----------------------------------------------------------------------------------------------------|---------|--------------------------------------------------------------------------------------------------------------------------------------------------------------------------------------------|---------------------|
| <b>Title and abstract</b>                                                                          | 1       | (a) Indicate the study's design with a commonly used term in the title or the abstract                                                                                                     | 1,2                 |
|                                                                                                    |         | (b) Provide in the abstract an informative and balanced summary of what was done and what was found                                                                                        | 2,3                 |
| <b>Introduction</b>                                                                                |         |                                                                                                                                                                                            |                     |
| Background/rationale                                                                               | 2       | Explain the scientific background and rationale for the investigation being reported                                                                                                       | 5                   |
| Objectives                                                                                         | 3       | State specific objectives, including any prespecified hypotheses                                                                                                                           | 6                   |
| <b>Methods</b>                                                                                     |         |                                                                                                                                                                                            |                     |
| Study design                                                                                       | 4       | Present key elements of study design early in the paper                                                                                                                                    | 6                   |
| Setting                                                                                            | 5       | Describe the setting, locations, and relevant dates, including periods of recruitment, exposure, follow-up, and data collection                                                            | 6,7                 |
| Participants                                                                                       | 6       | (a) <i>Cohort study</i> —Give the eligibility criteria, and the sources and methods of selection of participants. Describe methods of follow-up                                            | 7,8                 |
|                                                                                                    |         | <i>Case-control study</i> —Give the eligibility criteria, and the sources and methods of case ascertainment and control selection. Give the rationale for the choice of cases and controls |                     |
|                                                                                                    |         | <i>Cross-sectional study</i> —Give the eligibility criteria, and the sources and methods of selection of participants                                                                      |                     |
| Variables                                                                                          | 7       | (b) <i>Cohort study</i> —For matched studies, give matching criteria and number of exposed and unexposed                                                                                   | 7,8                 |
|                                                                                                    |         | <i>Case-control study</i> —For matched studies, give matching criteria and the number of controls per case                                                                                 |                     |
| Data sources/measurement                                                                           | 8*      | Clearly define all outcomes, exposures, predictors, potential confounders, and effect modifiers. Give diagnostic criteria, if applicable                                                   | 8                   |
| Bias                                                                                               | 9       | For each variable of interest, give sources of data and details of methods of assessment (measurement). Describe comparability of assessment methods if there is more than one group       | 8                   |
| Study size                                                                                         | 10      | Describe any efforts to address potential sources of bias                                                                                                                                  | 8                   |
| Quantitative variables                                                                             | 11      | Explain how the study size was arrived at                                                                                                                                                  | 7,8                 |
| Statistical methods                                                                                | 12      | Explain how quantitative variables were handled in the analyses. If applicable, describe which groupings were chosen and why                                                               | 7,8                 |
|                                                                                                    |         | (a) Describe all statistical methods, including those used to control for confounding                                                                                                      | 8,9                 |
|                                                                                                    |         | (b) Describe any methods used to examine subgroups and interactions                                                                                                                        | 8,9                 |
|                                                                                                    |         | (c) Explain how missing data were addressed                                                                                                                                                | 26                  |
|                                                                                                    |         | (d) <i>Cohort study</i> —If applicable, explain how loss to follow-up was addressed                                                                                                        | 26                  |
| <i>Case-control study</i> —If applicable, explain how matching of cases and controls was addressed |         |                                                                                                                                                                                            |                     |
|                                                                                                    |         | <i>Cross-sectional study</i> —If applicable, describe analytical methods taking account of sampling strategy                                                                               | 9                   |
|                                                                                                    |         | (e) Describe any sensitivity analyses                                                                                                                                                      | 9                   |

| Section/Topic            | Item No | Recommendation                                                                                                                                                                                               | Reported on Page No |
|--------------------------|---------|--------------------------------------------------------------------------------------------------------------------------------------------------------------------------------------------------------------|---------------------|
| <b>Results</b>           |         |                                                                                                                                                                                                              |                     |
| Participants             | 13*     | (a) Report numbers of individuals at each stage of study—eg numbers potentially eligible, examined for eligibility, confirmed eligible, included in the study, completing follow-up, and analysed            | 10                  |
|                          |         | (b) Give reasons for non-participation at each stage                                                                                                                                                         | 26                  |
|                          |         | (c) Consider use of a flow diagram                                                                                                                                                                           | 26                  |
| Descriptive data         | 14*     | (a) Give characteristics of study participants (eg demographic, clinical, social) and information on exposures and potential confounders                                                                     | 10,22               |
|                          |         | (b) Indicate number of participants with missing data for each variable of interest                                                                                                                          | 26                  |
|                          |         | (c) <i>Cohort study</i> —Summarise follow-up time (eg, average and total amount)                                                                                                                             | 10,27               |
| Outcome data             | 15*     | <i>Cohort study</i> —Report numbers of outcome events or summary measures over time                                                                                                                          | 10,27               |
|                          |         | <i>Case-control study</i> —Report numbers in each exposure category, or summary measures of exposure                                                                                                         |                     |
|                          |         | <i>Cross-sectional study</i> —Report numbers of outcome events or summary measures                                                                                                                           |                     |
| Main results             | 16      | (a) Give unadjusted estimates and, if applicable, confounder-adjusted estimates and their precision (eg, 95% confidence interval). Make clear which confounders were adjusted for and why they were included | 10,23               |
|                          |         | (b) Report category boundaries when continuous variables were categorized                                                                                                                                    |                     |
|                          |         | (c) If relevant, consider translating estimates of relative risk into absolute risk for a meaningful time period                                                                                             |                     |
| Other analyses           | 17      | Report other analyses done—eg analyses of subgroups and interactions, and sensitivity analyses                                                                                                               | 10,11,24            |
| <b>Discussion</b>        |         |                                                                                                                                                                                                              |                     |
| Key results              | 18      | Summarise key results with reference to study objectives                                                                                                                                                     | 11                  |
| Limitations              | 19      | Discuss limitations of the study, taking into account sources of potential bias or imprecision. Discuss both direction and magnitude of any potential bias                                                   | 14                  |
| Interpretation           | 20      | Give a cautious overall interpretation of results considering objectives, limitations, multiplicity of analyses, results from similar studies, and other relevant evidence                                   | 11-14               |
| Generalisability         | 21      | Discuss the generalisability (external validity) of the study results                                                                                                                                        | 13,14               |
| <b>Other Information</b> |         |                                                                                                                                                                                                              |                     |
| Funding                  | 22      | Give the source of funding and the role of the funders for the present study and, if applicable, for the original study on which the present article is based                                                | 15                  |

\*Give information separately for cases and controls in case-control studies and, if applicable, for exposed and unexposed groups in cohort and cross-sectional studies.

**Note:** An Explanation and Elaboration article discusses each checklist item and gives methodological background and published examples of transparent reporting. The STROBE checklist is best used in conjunction with this article (freely available on the Web sites of PLoS Medicine at <http://www.plosmedicine.org/>, Annals of Internal Medicine at <http://www.annals.org/>, and Epidemiology at <http://www.epidem.com/>). Information on the STROBE Initiative is available at [www.strobe-statement.org](http://www.strobe-statement.org).

# BMJ Open

## Retrospective Cohort Study on Risk of Hearing Loss in Patients with Rheumatoid Arthritis Using Claims Data

|                                 |                                                                                                                                                                                                                                                                                                                                                                                                                                                                                                                                                                                                                                                                                                                                                                                                                                                                                                                                          |
|---------------------------------|------------------------------------------------------------------------------------------------------------------------------------------------------------------------------------------------------------------------------------------------------------------------------------------------------------------------------------------------------------------------------------------------------------------------------------------------------------------------------------------------------------------------------------------------------------------------------------------------------------------------------------------------------------------------------------------------------------------------------------------------------------------------------------------------------------------------------------------------------------------------------------------------------------------------------------------|
| Journal:                        | <i>BMJ Open</i>                                                                                                                                                                                                                                                                                                                                                                                                                                                                                                                                                                                                                                                                                                                                                                                                                                                                                                                          |
| Manuscript ID                   | bmjopen-2017-018134.R2                                                                                                                                                                                                                                                                                                                                                                                                                                                                                                                                                                                                                                                                                                                                                                                                                                                                                                                   |
| Article Type:                   | Research                                                                                                                                                                                                                                                                                                                                                                                                                                                                                                                                                                                                                                                                                                                                                                                                                                                                                                                                 |
| Date Submitted by the Author:   | 16-Nov-2017                                                                                                                                                                                                                                                                                                                                                                                                                                                                                                                                                                                                                                                                                                                                                                                                                                                                                                                              |
| Complete List of Authors:       | Huang, Chung-Ming; China Medical University Hospital, Division of Immunology and Rheumatology, Department of Internal Medicine; China Medical University, Graduate Institute of Integrated Medicine, College of Chinese Medicine<br>Chen, Hsuan-Ju; China Medical University Hospital, Management Office for Health Data; China Medical University, College of Medicine<br>Huang, Po-Hao; China Medical University Hospital, Division of Immunology and Rheumatology, Department of Internal Medicine<br>Tsay, Gregory J; China Medical University Hospital, Division of Immunology and Rheumatology, Department of Internal Medicine<br>Lan, Joung-Liang; China Medical University Hospital, Division of Immunology and Rheumatology, Department of Internal Medicine<br>Sung, Fung-Chang; China Medical University Hospital, Management Office for Health Data; China Medical University, Department of Health Services Administration |
| <b>Primary Subject Heading</b>: | Rheumatology                                                                                                                                                                                                                                                                                                                                                                                                                                                                                                                                                                                                                                                                                                                                                                                                                                                                                                                             |
| Secondary Subject Heading:      | Epidemiology, Ear, nose and throat/otolaryngology                                                                                                                                                                                                                                                                                                                                                                                                                                                                                                                                                                                                                                                                                                                                                                                                                                                                                        |
| Keywords:                       | Rheumatoid arthritis, hearing loss, insurance data,, retrospective cohort study                                                                                                                                                                                                                                                                                                                                                                                                                                                                                                                                                                                                                                                                                                                                                                                                                                                          |
|                                 |                                                                                                                                                                                                                                                                                                                                                                                                                                                                                                                                                                                                                                                                                                                                                                                                                                                                                                                                          |

SCHOLARONE™  
Manuscripts

## Retrospective Cohort Study on Risk of Hearing Loss in Patients with Rheumatoid Arthritis Using Claims Data

Chung-Ming Huang<sup>1,2</sup>, Hsuan-Ju Chen<sup>3,4</sup>, Po-Hao Huang<sup>1</sup>, Gregory J Tsay<sup>1</sup>,  
Joung-Liang Lan<sup>1</sup>, Fung-Chang Sung<sup>3,5</sup>

**Running Title:** Hearing loss in rheumatoid arthritis

<sup>1</sup>Division of Immunology and Rheumatology, Department of Internal Medicine, China Medical University Hospital, Taichung, Taiwan;

<sup>2</sup>Graduate Institute of Integrated Medicine, College of Chinese Medicine, China Medical University, Taichung, Taiwan

<sup>3</sup>Management Office for Health Data, China Medical University Hospital, Taichung, Taiwan

<sup>4</sup>College of Medicine, China Medical University, Taichung, Taiwan

<sup>5</sup>Department of Health Services Administration, China Medical University, Taichung, Taiwan

Corresponding author:

Fung-Chang Sung, PhD, MPH  
Department of Health Services Administration, China Medical University  
91 Hsueh Shih Road  
Taichung 404, Taiwan  
Tel: 886-4-2205-4070  
Fax: 886-4-2235-8326  
E-mail: fcsung1008@yahoo.com

Word count: Abstract 238; Strength and limitation 150; Text 2658; 5 Tables; 2 Figures.

## ABSTRACT

**Objectives** Population studies on hearing loss (HL) associated with rheumatoid arthritis (RA) are lacking. This study investigated the risk of developing HL in patients with RA using a nationwide population cohort.

**Setting** The population-based insurance claims data in the Taiwan National Health Insurance Research Database

**Design** Retrospective cohort study followed up RA cohort and control cohort without RA frequency-matched by sex, age, and diagnosis year.

**Study population** 18,267 RA patients newly diagnosed in 2000-2006 and 73,068 controls without RA.

**Main outcomes** Incidences of HL by the end of 2011 and the RA cohort to non-RA cohort hazard ratios (HRs) after adjusting for sex, age, and comorbidities.

**Results** The HL incidence was higher in the RA cohort than in the non-RA cohort (3.08 versus 1.62 per 1000 person-years), with an adjusted HR of 1.91 (95% confidence interval = 1.70-2.14) for the RA cohort relative to the non-RA cohort after controlling for age, sex, and comorbidities. Men and the elderly are at a higher risk. Cardiovascular comorbidities were associated with a further increased HL risk for RA



1  
2  
3 patients. Medications were associated with reduced HL incidence; RA patients who  
4  
5  
6 used NSAIDs had an aHR of 0.12 (95% CI = 0.07-0.20), compared with non-users.  
7  
8  
9

10 **Conclusions** This study demonstrates that patients with RA are at an increased risk of  
11  
12 developing HL. Findings highlight the need of disease-modifying treatment and  
13  
14 scheduled auditory examinations for HL prevention and early detection for RA  
15  
16 patients.  
17  
18  
19  
20  
21

22 **Keywords:** Rheumatoid arthritis, hearing loss, insurance data, retrospective cohort  
23  
24 study  
25  
26  
27  
28  
29  
30  
31  
32  
33  
34  
35  
36  
37  
38  
39  
40  
41  
42  
43  
44  
45  
46  
47  
48  
49  
50  
51  
52  
53  
54  
55  
56  
57  
58  
59  
60

### Strengths and limitations of this study

1. The strength of this study is the use of a nationwide population-based cohort to identify HL risk in an Asian population with RA. Our findings can be generalized to the general population.
2. The inclusion of the Catastrophic Illness Patient Database confirmed the diagnoses of all RA cases with increased the reliability of our data; the large sample size reduced the tendency for selection bias, enhanced statistical power and precision of risk appraisal.
3. Limitations in this study: Information on several suspected risk factors for HL, such as smoking and chronic exposure to occupational and environmental noise, which could be associated with HL in the general population, were not available in the insurance database.
4. Information on laboratory test results and HL by severity and sound frequency (high, mid or low frequency), and on RA severity scale, such as disease activity, functional impairment and physical damage was also unavailable.

## INTRODUCTION

Rheumatoid arthritis (RA) is a disease predominantly characterized by chronic joint inflammation and is often accompanied by several peripheral inflammatory manifestations.<sup>1</sup> RA may lead to the destruction of the cartilage and bone due to chronic synovitis and may consequently impair joint function.<sup>2</sup> In addition, patients with RA may have extra-articular manifestations involving other organ systems,<sup>3</sup> such as auditory system alteration, although with a different putative mechanism of damage.<sup>4-6</sup> With respect to the auditory system, previous studies have shown conflicting findings, in both hearing loss (HL) and the RA disease activity and severity.<sup>7-10</sup>

There are a wide variations in the reported prevalence of HL in patients with RA. Sensorineural hearing loss (SNHL) is the most common hearing impairment in patients with RA, ranging from 25 to 72%,<sup>11</sup> whereas conductive HL and mixed HL are less frequently reported.<sup>4,6,12</sup> SNHL could be induced by a direct immune response of either T or B cells against inner ear proteins.<sup>13</sup> Neurovascular inflammation and drugs used for RA treatment could also damage the cochlea.<sup>14</sup> Thus, HL may be a manifestation of systemic vascular involvement in patients with RA and may have a significant effect on the health of patients with RA. However, the risk of developing HL in patients with RA has not been well examined using population data.

1  
2  
3  
4 Hence, the purpose of this study was to investigate the risk of HL in patients with  
5  
6 RA, using representative insurance claims data obtained from the Taiwan National  
7  
8 Health Insurance (NHI). The HL risk associated with other comorbidities, such as  
9  
10 coronary heart disease, hypertension, stroke, diabetes, hyperlipidemia,  
11  
12 hyperthyroidism, hypothyroidism, chronic renal disease and autoimmune diseases,  
13  
14 were also evaluated.  
15  
16  
17  
18  
19  
20  
21  
22

## 23 **MATERIALS AND METHODS**

### 24 **Data source**

25  
26  
27  
28  
29 The Taiwan NHI system is a single-payer compulsory programme with a  
30  
31 coverage of over 99% of 23.74 million people.<sup>15</sup> We conducted this study using two  
32  
33 data sets: the Registry for Catastrophic Illness Patient Database (CIPD) and the  
34  
35 Longitudinal Health Insurance Database (LHID2000), obtained from the Taiwan  
36  
37 National Health Research Institutes. Patients with major diseases, such as cancer,  
38  
39 chronic mental illness, end-stage renal disease and several autoimmune diseases  
40  
41 requiring long-term care are eligible for the CIPD coverage for exemption from  
42  
43 making co-payment. The LHID2000 contains the claims data of 1,000,000 people  
44  
45 randomly sampled from all populations being registered in 2000 for the insurance  
46  
47 coverage. Reimbursement claims data for medical services from 1996 to 2011 in both  
48  
49  
50  
51  
52  
53  
54  
55  
56  
57  
58  
59  
60

1  
2  
3  
4 data sets were used in this study. For privacy protection, all personal identifications  
5  
6 were replaced with surrogate identifications suitable for public use and data linkage.  
7

8  
9 The claims data contained information on the demographic status of the insured  
10  
11 people, dates of treatment and treatments received, diagnostic codes, prescriptions,  
12  
13 and costs. Diagnoses of diseases were coded with the International Classification of  
14  
15 Disease Diagnoses, 9th Revision of Clinical Modification (ICD-9-CM). Several  
16  
17 studies in Taiwan using the insurance claims data have demonstrated high accuracy  
18  
19 and validity of ICD-9 diagnosis.<sup>16,17</sup> This study was approved by the Research Ethics  
20  
21 Committee of China Medical University and Hospital (CMUH104-REC2-115).  
22  
23  
24  
25  
26  
27  
28

### 29 **Study population**

30  
31  
32 Figure 1 shows the flowchart for identifying and selecting study population using  
33  
34 a population-based retrospective cohort study design. We identified a RA cohort from  
35  
36 the registry for CIPD and a non-RA cohort from the LHID2000. Patients newly  
37  
38 diagnosed with RA (ICD-9-CM 714.0) from 2000 to 2006 without HL were included  
39  
40 in the RA cohort. The date with RA certificated as the catastrophic illness was  
41  
42 considered as the index date for the approved patients. Patients who met four or more  
43  
44 of the diagnostic criteria based on the 1987 American College of Rheumatology  
45  
46 criteria were considered as having RA and those diagnosed by rheumatologists were  
47  
48 included in the RA cohort.<sup>18</sup> The application for catastrophic illness status was  
49  
50  
51  
52  
53  
54  
55  
56  
57  
58  
59  
60

1  
2  
3  
4 scrutinized by peer review.  
5

6 For each patient with RA, four insured people without history of RA and HL  
7  
8 were randomly selected from the LHID2000 for the non-RA cohort and were  
9  
10 frequency-matched by sex, age (each 5-year span), and index year. Individuals with  
11  
12 missing information on age and/or sex or with history of HL (ICD-9-CM 388.2, 388.4,  
13  
14 389.00, 389.10, 389.12, 389.2, and 389.9) at baseline were excluded from the non-RA  
15  
16 cohort.  
17  
18  
19  
20  
21

22  
23 Both cohorts were followed from the index date to the date with HL diagnosed,  
24  
25 death, withdrawal from the NHI system, or the end of 2011. In general, HL was  
26  
27 diagnosed based on the audiometry test. To increase the validity of HL diagnosis, only  
28  
29 patients with three or more diagnoses in outpatient claims or an inpatient record were  
30  
31 included in the study. Patients who were suspected of having HL received  
32  
33 comprehensive examinations and, subsequently, treatment was followed when the  
34  
35 disorder was confirmed. In the insurance system, HL patients' medical reimbursement  
36  
37 and discharge notes are scrutinised by peer review. The insurance system also  
38  
39 randomly reviewed insurance claims to prevent errors and violations. Therefore,  
40  
41 diagnoses and codes of HL in the study were highly reliable.<sup>16</sup>  
42  
43  
44  
45  
46  
47  
48  
49

## 50 51 **Statistical analysis** 52

53  
54 Distributions of sex and age (20-39, 40-59, and  $\geq 60$  years) and baseline  
55  
56  
57  
58  
59

1  
2  
3  
4 comorbidities, including diabetes (ICD-9-CM 250), hyperlipidemia (ICD-9-CM 272),  
5  
6  
7 hypertension (ICD-9-CM 401-405), hyperthyroidism (ICD-9-CM 242), ischemic heart  
8  
9  
10 disease (IHD; ICD-9-CM 410-414), stroke (ICD-9-CM 430-438), chronic kidney  
11  
12  
13 disease (CKD; ICD-9-CM 580-589), hypothyroidism (ICD-9-CM 244), and  
14  
15  
16 autoimmune diseases (including psoriasis [ICD-9-CM 696], systemic lupus  
17  
18  
19 erythematosus [ICD-9-CM 710.0], systemic sclerosis [ICD-9-CM 710.1], Sjogren  
20  
21  
22 syndrome [ICD-9-CM 710.2], dermatomyositis [ICD-9-CM 710.3], polymyositis  
23  
24  
25 [ICD-9-CM 710.4], and vasculitis [ICD-9-CM 446.0, 446.2, 446.4, 446.5, 443.1,  
26  
27  
28 446.7, 446.1, and 136.1]), between the RA and non-RA cohorts were compared. A  
29  
30  
31 standardized mean difference of less than 0.1 was a negligible difference between two  
32  
33  
34 means or two prevalence rates<sup>19</sup>. The incidence density of HL per 1000 person-years  
35  
36  
37 was calculated during the follow-up period by sex, age and comorbidity. The  
38  
39  
40 Kaplan-Meier method was employed to plot the cumulative incidence of HL for each  
41  
42  
43 cohort during the follow-up period, and the log-rank test was used to assess the  
44  
45  
46 differences between the two curves. Univariate and multivariate Cox proportional  
47  
48  
49 hazards regression analyses were used to measure the RA cohort to non-RA cohort  
50  
51  
52 crude hazard ratio (cHR) and adjusted hazard ratio (aHR) of HL, respectively, and  
53  
54  
55 their 95% confidence intervals (CIs). Sex, age, and comorbidities including diabetes,  
56  
57  
58 hyperlipidemia, hypertension, hyperthyroidism, hypothyroidism, IHD, stroke, CKD  
59  
60

1  
2  
3  
4 and autoimmune diseases, were included as covariates in the multivariate Cox  
5  
6 regression analysis. To further assess the robustness of our results, we also evaluated  
7  
8 the association between RA and HL risk in various subgroups by sex, age, and each  
9  
10 comorbidity. We further evaluated the treatment effectiveness of medications for RA  
11  
12 patients by calculating the incidence density and HRs of HL. The HL relating to  
13  
14 medications for RA treatment was evaluated, including nonsteroidal  
15  
16 anti-inflammatory drugs (NSAIDs), prednisolone, disease-modifying antirheumatic  
17  
18 drugs (DMARDs, including hydroxychloroquine, sulfasalazine, methotrexate, and  
19  
20 leflunomide), and tumor necrosis factor (TNF, including etanercept and adalimumab).  
21  
22 Further analysis evaluated the HL risk by the type of HL: sensorineural, conductive or  
23  
24 mixed.  
25  
26  
27  
28  
29  
30  
31  
32  
33

34 All analyses were conducted using SAS statistical software (version 9.4 for  
35  
36 Windows; SAS Institute, Cary, North Carolina, USA), and all statistical tests were  
37  
38 performed at the two-tailed significance level of 0.05.  
39  
40  
41  
42  
43  
44  
45

## 46 **RESULTS**

47  
48 We identified 18,267 RA patients newly diagnosed from 2000 to 2006 for the  
49  
50 RA cohort and 73,068 persons without RA for the non-RA cohort as controls (Table  
51  
52 1). There were more women than men (78.4 vs. 21.6%) in both cohorts.  
53  
54  
55  
56  
57  
58  
59  
60



1  
2  
3  
4 Approximately 66.7% of the study populations were <60 years old. Prevalence rates  
5  
6 of CKD and autoimmune diseases were more prevalent in patients with RA than in  
7  
8 controls at the baseline.  
9

10  
11 The Kaplan-Meier method estimated cumulative incidence of HL was 1.5%  
12  
13 greater in the RA cohort than in the non-RA cohort (3.3 vs. 1.8%;  $p$  value < 0.001 in  
14  
15 the log-rank test) (Fig. 2). The incidence density of HL was approximately two-fold  
16  
17 greater in the RA cohort than in the non-RA cohort (3.08 vs. 1.62 per 1000  
18  
19 person-years), with an aHR of 1.91 (95% CI = 1.70-2.14) (Table 2). Men were at a  
20  
21 greater risk of HL than women, and the risk increased with age. Compared to 20–39  
22  
23 years old, the aHRs of HL were 2.89 (95% CI = 2.21-3.79) and 5.27 (95% CI =  
24  
25 3.99-6.95) for those aged 40-59 and those aged  $\geq 60$  years, respectively. The HL risk  
26  
27 for individuals with comorbidities was also elevated. Patients with hypertension and  
28  
29 IHD were significantly associated with higher risk of HL compared with their  
30  
31 counterparts without the disorder, with aHRs of 1.21 (95% CI = 1.07-1.38) and of  
32  
33 1.36 (95% CI = 1.19-1.56), respectively.  
34  
35  
36  
37  
38  
39  
40  
41  
42  
43  
44  
45

46 Table 3 shows that incidence rates of HL stratified by sex, age, and comorbidity  
47  
48 were consistently greater in the RA cohort than in the non-RA cohort. Comorbidity  
49  
50 was associated with further increased HL risk for RA patients. RA patients with  
51  
52 comorbid IHD had the highest incident HL, 5.60 per 1000 person-years.  
53  
54  
55  
56  
57  
58  
59  
60

1  
2  
3  
4 Table 4 shows that medications were associated with reduced incident HL for RA  
5  
6 patients. Near 99% of RA patients used NSAIDs and users had a HL incidence of 2.98  
7  
8 per 1000 person-years, with an aHR of 0.12 (95% CI = 0.07-0.20) compared with  
9  
10 non-users who had an incidence of 30.1 per 1000 person-years for HL. RA patients on  
11  
12 medications of adalimumab (n = 950) had the lowest HL incidence of 0.64 per 1000  
13  
14 person-years with an aHR of 0.23 (95% CI = 0.10-0.55), compared with non-users  
15  
16 who had an incidence of 3.23 per 1000 person-years.  
17  
18  
19  
20  
21  
22

23 Further evaluation on the subtype HL showed that RA patients had only few cases  
24  
25 of conductive HL, but were at increased risk of sensorineural HL and mixed HL with  
26  
27 adjusted HRs of 2.35 (95% CI = 1.91–2.89) and 1.77 (95% CI = 1.54–2.03),  
28  
29 respectively (Table 5).  
30  
31  
32  
33

## 34 **DISCUSSION**

35  
36  
37 This retrospective cohort study showed that patients with RA were nearly two-fold  
38  
39 more likely to develop HL than those without RA. The risk of HL associated with RA  
40  
41 increased with age. In the RA cohort, those  $\geq 60$  years old had an HL incidence of 4.92  
42  
43 per 1000 person-years, which was 4.16 per 1000 person-year greater than that of  
44  
45 patients aged 20-39 years. The corresponding difference was 2.49 per 1000  
46  
47 person-years between the 2 age groups in the non-RA cohort, reflecting the natural HL  
48  
49 by aging in the non-RA cohort. Similar to reports in other studies, HL is age dependent  
50  
51  
52  
53  
54  
55  
56  
57  
58  
59  
60

1  
2  
3  
4 in patients and control subjects.<sup>6,14,20</sup> This finding is also consistent with previous  
5  
6 studies for patients with sudden sensorineural hearing loss comorbid with systemic  
7  
8 lupus erythematosus and psoriasis,<sup>21,22</sup> The excess HL risk could be 50% in patients  
9  
10 with psoriasis.  
11  
12  
13

14  
15 We also found that, in the RA cohort, men had an incidence of 4.09 per 1000  
16  
17 person-years for HL, which was 1.26 per 1000 person-years greater than women had.  
18  
19 The corresponding difference was 0.78 per 1000 person-years in the non-RA cohort,  
20  
21 indicating the relationship between RA and HL risk may be slightly greater for men. In  
22  
23 the entire study population, the overall aHR was 1.40 for men compared with women  
24  
25 (Table 2). There is a remarkable imbalance between the number of males and females  
26  
27 with autoimmune diseases, with females representing the majority of cases. Although  
28  
29 reasons for this overrepresentation of women are unclear, genetic (X-linked) factors and  
30  
31 hormonal aspects are likely involved. Halligan et al.<sup>23</sup> investigated patients with RA  
32  
33 and also demonstrated that the prevalence of abnormal hearing is significantly greater  
34  
35 in males (86% or 12/14) than in females (33% or 5/15) ( $p = 0.008$ ). However, no  
36  
37 significant gender difference in HL among those without RA was found ( $p = 0.715$ ).  
38  
39  
40  
41  
42  
43  
44  
45  
46  
47  
48

49 Evidences have shown that patients with RA are prevalent with comorbidities, such  
50  
51 as IHD<sup>24-26</sup>, stroke<sup>27</sup>, hypertension<sup>28,29</sup>, diabetes<sup>30-32</sup>, dyslipidemia<sup>27,33</sup>, CKD<sup>34,35</sup> and  
52  
53 thyroid disorders<sup>36-38</sup>. In this study, the study populations in both cohorts were young.  
54  
55  
56  
57  
58  
59  
60

1  
2  
3  
4 The baseline prevalence rates of most comorbidities between the 2 cohorts were not  
5  
6 significantly different, except that CKD and autoimmune diseases were more prevalent  
7  
8 in patients with RA than in controls without RA at the baseline (Table 1). However, it is  
9  
10 interest to note that most of the comorbidities are associated with further increased  
11  
12 incidence of HL, greater for the RA cohort than for the non-RA cohort, except  
13  
14 hypothyroidism, and autoimmune diseases (Table 3). Autoimmune disease is a possible  
15  
16 pathology associated with sensorineural hearing loss because of the destruction of the  
17  
18 cochlear hair cells.<sup>39</sup> Our study failed to prove this relationship.  
19  
20  
21  
22  
23  
24  
25

26 The development of RA and the breakdown of atherosclerotic plaques possibly  
27  
28 share common factors contributing to inflammatory cells and pro-inflammatory  
29  
30 cytokines.<sup>25</sup> Pro-inflammatory cytokines may contribute to the oxidative damage in the  
31  
32 inner ear.<sup>26</sup> For example, both tumor necrosis factor (TNF)- $\alpha$  and interleukin (IL)-6 are  
33  
34 involved in the pathogenesis of both RA and atherosclerosis.<sup>40</sup> However, Takatsu et al.  
35  
36 showed that the pro-inflammatory cytokines (IL-6) and matrix metalloproteinase (MMP)  
37  
38 -3 may contribute to harm inner ear cells by an oxidative process.<sup>6</sup> Both RA and HL  
39  
40 may have a shared mechanism associating with cardiovascular diseases which account  
41  
42 for the higher risk of hearing loss in patients with RA. IHD alone may associate with  
43  
44 HL. An earlier study found patients with IHD are prevalent with HL for up to over  
45  
46 30%.<sup>41</sup> Moreover, in this study, we found that patients with RA with IHD had the  
47  
48  
49  
50  
51  
52  
53  
54  
55  
56  
57  
58  
59  
60

1  
2  
3  
4 highest HL incidence among patients with cardiovascular disorders. Hence, RA and  
5  
6 cardiovascular disorders may have a shared contribution to the HL risk.  
7

8  
9 Furthermore, several studies have reported elevated plasma renin and  
10  
11 angiotensin-converting enzyme (ACE) activities in patients with RA.<sup>42,43</sup> Poor blood  
12  
13 pressure control could induce changes in the renin-angiotensin system. Higher  
14  
15 oxidative stress in patients with RA could also impair the vasodilatory mechanism of  
16  
17 the endothelium,<sup>43</sup> which could be associated with the higher HL risk in patients with  
18  
19 RA. Hence, hypertension is likely another risk factor contributing to HL. The findings  
20  
21 in our study further demonstrate the association between autoimmune disease and HL  
22  
23 risk.  
24  
25  
26  
27  
28  
29  
30

31  
32 After adjustment for sex, age, and comorbidity, we found reduced HL risk for  
33  
34 RA patients on medication of NSAID, prednisolone, DMARDs and TNF. Conversely,  
35  
36 Halligan et al.<sup>23</sup> described an association between HL and hydroxychloroquine, and  
37  
38 Dikici et al.<sup>44</sup> observed a dose relation between HL using methotrexate. On the other  
39  
40 hand, some studies found no relationship between HL and RA treatment using NSAID,  
41  
42 corticosteroid and DMARDs.<sup>6,9,20,45</sup> The inconsistent results may be due to the  
43  
44 relatively small study sample sizes, while our study is a nationwide population-based  
45  
46 cohort with large sample size. It is likely, the reduced inflammation in patients with RA  
47  
48 on medications of NSAID, corticosteroid, DMARDs and TNF could be associated with  
49  
50  
51  
52  
53  
54  
55  
56  
57  
58  
59  
60

1  
2  
3  
4 reducing the HL risk.  
5

6 The strength of this study is the use of a nationwide population-based cohort to  
7 evaluate HL risk in an Asian population with RA. Our findings can be generalized to  
8 the general population. The large sample size allowed the identification of risk factors  
9 associated with the development of HL in Taiwan with a minimal tendency for  
10 selection bias, and enhanced the statistical power and precision of risk appraisal. In  
11 addition, the inclusion of the CIPD confirmed the diagnoses of all RA cases in the  
12 NHIRD database, which increased the reliability of our data.  
13  
14  
15  
16  
17  
18  
19  
20  
21  
22  
23  
24

25 However, several limitations to the interpretation of our findings should be  
26 considered. Information on several suspected risk factors for HL was unavailable, such  
27 as smoking and chronic exposure to occupational and environmental noise, which could  
28 be associated with HL for both cohorts. Moreover, information was also unavailable on  
29 laboratory test results, HL severity and RA severity scale and activity, functional  
30 impairment and physical damage of the disease. Hearing impairments by specific sound  
31 frequency were not measured to differentiate high, mid or low frequency HL.  
32  
33  
34  
35  
36  
37  
38  
39  
40  
41  
42  
43  
44  
45

46 In conclusion, this study demonstrated that patients with RA are at an elevated  
47 risk of developing HL. Our findings also suggest the need for prompt treatment and  
48 early detection of RA for HL prevention. Appropriate and timely medical interventions  
49 may improve the prognosis of HL for patients diagnosed with RA.  
50  
51  
52  
53  
54  
55  
56  
57  
58  
59  
60

1  
2  
3  
4  
5  
6  
7 **Contributors** The paper was conceived by CMH, HJC, PHH, GJT and JLL. CMH,  
8  
9 HJC and FCS wrote the first draft, with further contributions from all authors.  
10  
11  
12 Statistical analyses were undertaken by CMH, HJC and FCS. CMH and FCS revised  
13  
14  
15 the article. All authors contributed to data interpretation, reviewed and approved the  
16  
17  
18 final version of the manuscript.  
19

20 **Funding** This study was supported by the Taiwan Ministry of Health and Welfare  
21  
22  
23 Clinical Trial and Research Center of Excellence (MOHW106-TDU-B-212-113004);  
24  
25  
26 China Medical University Hospital; Academia Sinica Taiwan Biobank, Stroke  
27  
28  
29 Biosignature Project (BM10601010036); Taiwan Clinical Trial Consortium for Stroke  
30  
31  
32 (MOST 106-2321-B-039-005); Tseng-Lien Lin Foundation, Taichung, Taiwan; Taiwan  
33  
34  
35 Brain Disease Foundation, Taipei, Taiwan; and Katsuzo and Kiyo Aoshima Memorial  
36  
37  
38 Funds, Japan, for their support.  
39

40 **Conflict of interest:** None.  
41

42  
43 **Competing interests:** None declared.  
44

45  
46 **Provenance and peer review:** Not commissioned; externally peer reviewed.  
47

48  
49 **Data sharing statement:** No additional data are available.  
50  
51  
52  
53  
54  
55  
56  
57  
58  
59

**REFERENCES:**

1. Scott DL, Wolfe F, Huizinga TW. Rheumatoid arthritis. *Lancet* 2010;376:1094–1098.
2. Harris ED Jr. Rheumatoid arthritis: pathophysiology and implications for therapy. *N Engl J Med* 1990;322:1277-1289.
3. Ozcan M, Karakus MF, Gunduz OH, Tuncel U, Sahin H. Hearing loss and middle ear involvement in rheumatoid arthritis. *Rheumatol Int* 2002;22:16–19.
4. Murdin L, Patel S, Walmsley J, Yeoh LH. Hearing difficulties are common in patients with rheumatoid arthritis. *Clin Rheumatol* 2008;27:637–640.
5. Emamifar A, Bjoerndal K, Hansen IM. Is Hearing Impairment Associated with Rheumatoid Arthritis? A Review. *Open Rheumatol J.* 2016 Mar 15;10:26-32.
6. Takatsu M, Higaki M, Kinoshita H, Mizushima Y, Koizuka I. Ear involvement in patients with rheumatoid arthritis. *Otol Neurotol* 2005;26:755–761.
7. Yildirim A, Surucu G, Dogan S, Karabiber M. Relationship between disease activity and hearing impairment in patients with rheumatoid arthritis compared with controls. *Clin Rheumatol.* 2016;35:309-314.
8. Magaro M, Zoli A, Altomonte Z, Mirone L, Corvino G, Di Girolamo S, et al. Sensorineural hearing loss in rheumatoid arthritis. *Clin Exp Rheum* 1990;8:487–490.



- 1  
2  
3  
4 9. Lobo FS, Dossi MO, Batista L, Shinzato MM. Hearing impairment in patients with  
5  
6 rheumatoid arthritis: association with anti-citrullinated protein antibodies. Clin  
7  
8  
9 Rheumatol. 2016;35:2327-2332  
10
- 11  
12 10. Salvinelli F, Cancilleri F, Casale M, Luccarelli V, Di Peco V, D'Ascanio L, et al.  
13  
14  
15 Hearing thresholds in patients affected by rheumatoid arthritis. Clin Otolaryngol  
16  
17  
18 2014;29:75–79.  
19
- 20  
21 11. Pascual-Ramos V, Contreras-Yáñez I, Rivera-Hoyos P, Enríquez L,  
22  
23  
24  
25  
26  
27  
28  
29  
30  
31  
32  
33  
34  
35  
36  
37  
38  
39  
40  
41  
42  
43  
44  
45  
46  
47  
48  
49  
50  
51  
52  
53  
54  
55  
56  
57  
58  
59  
60  
Ramírez-Anguiano J. Cumulative disease activity predicts incidental hearing  
impairment in patients with rheumatoid arthritis (RA). Clin Rheumatol 2014;33:  
315–321.
12. Bayazit YA, Yilmaz M, Gunduz B, Altinyay S, Kemaloglu YK, Onder M, et al.  
Distortion product otoacoustic emission findings in Behçet's disease and  
rheumatoid arthritis. ORL J Otorhinolaryngol Relat Spec 2007;69:233–238.
13. Mijovic T, Zeitouni A, Colmegna I. Autoimmune sensorineural hearing loss: the  
otology-rheumatology interface. Rheumatology (Oxford) 2013;52:780–789.
14. Ozturk A, Yalcin S, Kaygusuz I, Sahin S, Gok U, Karlidag T, et al. High-frequency  
hearing loss and middle ear involvement in rheumatoid arthritis. Am J Otolaryngol  
2014;25:411–417.

- 1  
2  
3  
4 15. Cheng SH, Chen CC, Tsai SL. The impacts of DRG-based payments on health care  
5  
6 provider behaviors under a universal coverage system: a population-based study.  
7  
8 Health Policy 2012;107:202–208.  
9  
10  
11  
12 16. Cheng CL, Kao YH, Lin SJ, Lee CH, Lai ML. Validation of the National Health  
13  
14 Insurance Research Database with ischemic stroke cases in Taiwan.  
15  
16 Pharmacoepidemiol Drug Saf 2011;20:236–242.  
17  
18  
19  
20 17. Yu YB, Gau JP, Liu CY, Yang MH, Chiang SC, Hsu HC, et al. A nation-wide  
21  
22 analysis of venous thromboembolism in 497 180 cancer patients with the  
23  
24 development and validation of a risk-stratification scoring system. Thromb  
25  
26 Haemost 2012;108:225–235.  
27  
28  
29  
30  
31 18. Arnett FC, Edworthy SM, Bloch DA, McShane DJ, Fries JF, Cooper NS, et al. The  
32  
33 American Rheumatism Association 1987 revised criteria for the classification of  
34  
35 rheumatoid arthritis. Arthritis Rheum 1988;3:315–324.  
36  
37  
38  
39  
40 19. Mamdani M, Sykora K, Li P, Normand SL, Streiner DL, Austin PC, et al.  
41  
42 Reader's guide to critical appraisal of cohort studies: 2. Assessing potential for  
43  
44 confounding. BMJ 2005; 330: 960–962.  
45  
46  
47  
48  
49 20. Pascual-Ramos V, Contreras-Yanez I, Enriquez L, Valdes S, Ramirez-Anguiano J  
50  
51 Hearing impairment in a tertiary-care- level population of Mexican rheumatoid  
52  
53 arthritis patients. J Clin Rheumatol 2012;18:393–398 .  
54  
55  
56  
57  
58  
59  
60

- 1  
2  
3  
4 21. Lin C, Lin SW, Weng SF, Lin YS. Risk of sudden sensorineural hearing loss in  
5  
6 patients with systemic lupus erythematosus: a population-based cohort study.  
7  
8  
9 Audiol Neurotol 2013;18:95–100.  
10  
11  
12 22. Yen YC, Lin YS, Weng SF, Lai FJ. Risk of sudden sensorineural hearing loss in  
13  
14 patients with psoriasis: a retrospective cohort study. Am J Clin Dermatol  
15  
16  
17 2015;16:213–220.  
18  
19  
20 23. Halligan CS, Bauch CD, Brey RH, Achenbach SJ, Bamlet WR, McDonald TJ, et al.  
21  
22  
23 Hearing loss in rheumatoid arthritis. Laryngoscope 2006;116:2044–2049.  
24  
25  
26 24. Tanaka K, Hamada K, Nakayama T, Matsuda S, Atsumi A, Shimura T, et al. Risk  
27  
28 for cardiovascular disease in Japanese patients with rheumatoid arthritis: a  
29  
30 large-scale epidemiological study using a healthcare database. Springerplus. 2016  
31  
32  
33 19;5:1111. doi: 10.1186/s40064-016-2800-6. eCollection 2016.  
34  
35  
36  
37 25. Hansson GK. Inflammatory mechanisms in atherosclerosis. J Thromb Haemost  
38  
39  
40 2009;7(Suppl 1):328–331.  
41  
42  
43 26. Evans P, Halliwell B. Free radicals and hearing. Cause, consequence, and criteria.  
44  
45  
46 Ann N Y Acad Sci 1999;888:19–40.  
47  
48  
49 27. Semb AG, Kvien TK, Aastveit AH, Jungner I, Pedersen TR, Walldius G, et al.  
50  
51  
52 Lipids, myocardial infarction and ischaemic stroke in patients with rheumatoid  
53  
54  
55  
56  
57  
58  
59  
60

- 1  
2  
3  
4 arthritis in the Apolipoprotein-related Mortality RISK (AMORIS) Study. *Ann*  
5  
6 *Rheum Dis* 2010;69:1996–2001.  
7  
8  
9 28. Boyer JF, Gourraud PA, Cantagrel A, Davignon JL, Constantin A. Traditional  
10  
11 cardiovascular risk factors in rheumatoid arthritis: a meta-analysis. *Joint Bone*  
12  
13 *Spine* 2011;78:179–183.  
14  
15  
16  
17 29. Protogerou, AD, Panagiotakos DB, Zampeli E, Argyris AA, Arida K,  
18  
19 Konstantonis GD, et al. Arterial hypertension assessed “out of office” in a  
20  
21 contemporary cohort of rheumatoid arthritis patients free of cardiovascular disease  
22  
23 is characterized by high prevalence, low awareness, poor control and increased  
24  
25  
26  
27  
28  
29  
30  
31  
32  
33  
34  
35  
36  
37  
38  
39  
40  
41  
42  
43  
44  
45  
46  
47  
48  
49  
50  
51  
52  
53  
54  
55  
56  
57  
58  
59  
60
- vascular damage-associated “white coat” phenomenon. *Arthritis Res Ther* 2013;15:  
R142. doi: 10.1186/ar4324.
30. Chung CP, Oeser A, Solus JF, Gebretsadik T, Shintani A, Avalos I, et al.  
Inflammation-associated insulin resistance: differential effects in rheumatoid  
arthritis and systemic lupus erythematosus define potential mechanisms. *Arthritis*  
*Rheum* 2008;58:2105–2112.
31. Giles JT, Danielides S, Szklo M, Post WS, Blumenthal RS, Petri M, et al. Insulin  
resistance in rheumatoid arthritis: disease-related indicators and associations with  
the presence and progression of subclinical atherosclerosis. *Arthritis Rheumatol*  
2015;67:626–636.

- 1  
2  
3  
4 32. Dessein PH, Joffe BI, Stanwix AE. Inflammation, insulin resistance, and aberrant  
5  
6 lipid metabolism as cardiovascular risk factors in rheumatoid arthritis. *J*  
7  
8  
9 *Rheumatol* 2003;30:1403–1405.  
10  
11  
12 33. Kavanaugh A. Dyslipoproteinaemia in a subset of patients with rheumatoid  
13  
14  
15 arthritis. *Ann Rheum Dis* 1994;53:551–552.  
16  
17  
18 34. Kochi M, Kohagura K, Shiohira Y, Iseki K, Ohya Y. Inflammation as a Risk of  
19  
20  
21 Developing Chronic Kidney Disease in Rheumatoid Arthritis. *PLoS One* 2016  
22  
23 18;11(8). e0160225. doi: 10.1371/journal.pone.0160225. eCollection 2016.  
24  
25  
26 35. Chiu HY, Huang HL, Li CH, Chen HA, Yeh CL, Chiu SH, et.al. Increased Risk of  
27  
28  
29 Chronic Kidney Disease in Rheumatoid Arthritis Associated with Cardiovascular  
30  
31  
32 Complications - A National Population-Based Cohort Study. *PLoS One* 2015;  
33  
34 10(9):e0136508. doi: 10.1371/journal.pone.0136508. eCollection 2015.  
35  
36  
37 36. Pan XF, Gu JQ, Shan ZY. Increased risk of thyroid autoimmunity in rheumatoid  
38  
39  
40 arthritis: a systematic review and meta-analysis. *Endocrine* 2015;50:79–86.  
41  
42  
43 37. Joshi P, Agarwal A, Vyas S, Kumar R. Prevalence of hypothyroidism in  
44  
45  
46 rheumatoid arthritis and its correlation with disease activity. *Trop Doct*  
47  
48 2017;47:6-10.  
49  
50  
51 38. Bourji K, Gatto M, Cozzi F, Doria A, Punzi L. Rheumatic and autoimmune thyroid  
52  
53  
54 disorders: a causal or casual relationship? *Autoimmun Rev* 2015;14:57-63.  
55  
56  
57  
58  
59  
60

- 1  
2  
3  
4 39. Goodall AF, Siddiq MA. Current understanding of the pathogenesis of  
5  
6 autoimmune inner ear disease: a review. *Clin Otolaryngol* 2015;40: 412–419.  
7  
8  
9 40. Libby P. Role of inflammation in atherosclerosis associated with rheumatoid  
10  
11 arthritis. *Am J Med* 2008;121:S21–31. adequate  
12  
13  
14 41. Susmano A, Rosenbush SW. Hearing loss and ischemic heart disease. *Am J Otol*  
15  
16 1988;9:403-408.  
17  
18 42. Samoriadova OS, Zharova EA, Masenko VP, Balabanova RM, Vil'chinskaia MIu,  
19  
20 Nasonov EL. The renin-angiotensin-aldosterone system and arterial hypertension in  
21  
22 patients with rheumatoid arthritis. *Klin Med (Mosk)*. 1991;69:69–71.  
23  
24  
25  
26 43. Sakuta T, Morita Y, Satoh M, Fox DA, Kashihara N. Involvement of the  
27  
28 renin-angiotensin system in the development of vascular damage in a rat model of  
29  
30 arthritis: effect of angiotensin receptor blockers. *Arthritis Rheum* 2010;62:1319–  
31  
32 1328.  
33  
34  
35  
36  
37 44. Dikici O, Muluk NB, Tosun AK, Unlusoy I. Subjective audiological tests and  
38  
39 transient evoked otoacoustic emissions in patients with rheumatoid arthritis:  
40  
41 analysis of the factors affecting hearing levels. *Eur Arch Otorhinolaryngol*  
42  
43 2009;266:1719–1726.  
44  
45  
46  
47  
48 45. Kastanioudakis I, Skevas A, Danielidis V, Tsiakou E, Drosos AA, Moustopoulos  
49  
50 MH. Inner ear involvement in rheumatoid arthritis: a prospective clinical study. *J*  
51  
52 *Laryngol Otol* 1995;109:713–718.  
53  
54  
55  
56  
57  
58  
59  
60

Table 1. Distribution of demographic factors and comorbidity compared between cohorts

| Variable                         | Non-RA cohort<br>N = 73,068 |        | RA cohort<br>N = 18,267 |        | Standardized mean<br>difference |
|----------------------------------|-----------------------------|--------|-------------------------|--------|---------------------------------|
|                                  | n                           | %      | n                       | %      |                                 |
| Sex                              |                             |        |                         |        |                                 |
| Female                           | 57288                       | 78.4   | 14322                   | 78.4   | <0.001                          |
| Male                             | 15780                       | 21.6   | 3945                    | 21.6   | <0.001                          |
| Age, years                       |                             |        |                         |        |                                 |
| 20-39                            | 12224                       | 16.7   | 3056                    | 16.7   | <0.001                          |
| 40-59                            | 36532                       | 50.0   | 9133                    | 50.0   | <0.001                          |
| ≥ 60                             | 24312                       | 33.3   | 6078                    | 33.3   | <0.001                          |
| Means (SD)                       | 53.3                        | (14.2) | 53.6                    | (13.9) | 0.021                           |
| Comorbidity                      |                             |        |                         |        |                                 |
| DM                               | 8102                        | 11.1   | 2114                    | 11.6   | 0.015                           |
| Hyperlipidemia                   | 14078                       | 19.3   | 3439                    | 18.8   | 0.011                           |
| Hypertension                     | 22844                       | 31.3   | 5964                    | 32.7   | 0.030                           |
| Hyperthyroidism                  | 1089                        | 1.49   | 456                     | 2.50   | 0.072                           |
| IHD                              | 10993                       | 15.0   | 2941                    | 16.1   | 0.029                           |
| Stroke                           | 2128                        | 2.91   | 483                     | 2.64   | 0.016                           |
| CKD                              | 4821                        | 6.60   | 2061                    | 11.3   | 0.165                           |
| Hypothyroidism                   | 407                         | 0.56   | 216                     | 1.18   | 0.067                           |
| Autoimmune diseases <sup>†</sup> | 433                         | 0.59   | 534                     | 2.92   | 0.178                           |

Abbreviation: RA, rheumatoid arthritis; SD, standard deviation; DM, diabetes mellitus; IHD, ischemic heart disease; CKD, chronic kidney disease.

<sup>†</sup>Autoimmune diseases including psoriasis, SLE, systemic sclerosis, Sjogren syndrome, dermatomyositis, polymyositis, and vasculitis.

Table 2. Cox model measured hazard ratios and 95% confidence intervals of hearing loss associated with rheumatoid arthritis and covariates

| Variables       | Event<br>n | Person-years | Incidence<br>density # | HR (95% CI)         |                           |
|-----------------|------------|--------------|------------------------|---------------------|---------------------------|
|                 |            |              |                        | Univariate          | Multivariate <sup>‡</sup> |
| RA              |            |              |                        |                     |                           |
| No              | 927        | 572031       | 1.62                   | ref                 | ref                       |
| Yes             | 429        | 139085       | 3.08                   | 1.90 (1.70-2.13)*** | 1.91 (1.70-2.14)***       |
| Sex             |            |              |                        |                     |                           |
| Female          | 977        | 565205       | 1.73                   | ref                 | ref                       |
| Male            | 379        | 145912       | 2.60                   | 1.49 (1.33-1.68)*** | 1.40 (1.24-1.58)***       |
| Age, years      |            |              |                        |                     |                           |
| 20-39           | 59         | 123836       | 0.48                   | ref                 | ref                       |
| 40-59           | 563        | 368175       | 1.53                   | 3.21 (2.45-4.19)*** | 2.89 (2.21-3.79)***       |
| ≥ 60            | 734        | 219105       | 3.35                   | 6.98 (5.35-9.10)*** | 5.27 (3.99-6.95)***       |
| Comorbidity     |            |              |                        |                     |                           |
| DM              |            |              |                        |                     |                           |
| No              | 1127       | 638984       | 1.76                   | ref                 | ref                       |
| Yes             | 229        | 72133        | 3.17                   | 1.78 (1.55-2.06)*** | 1.14 (0.98-1.33)          |
| Hyperlipidemia  |            |              |                        |                     |                           |
| No              | 974        | 578643       | 1.68                   | ref                 | ref                       |
| Yes             | 382        | 132474       | 2.88                   | 1.70 (1.51-1.92)*** | 1.10 (0.97-1.26)          |
| Hypertension    |            |              |                        |                     |                           |
| No              | 714        | 499747       | 1.43                   | ref                 | ref                       |
| Yes             | 642        | 211370       | 3.04                   | 2.11 (1.90-2.35)*** | 1.21 (1.07-1.38)**        |
| Hyperthyroidism |            |              |                        |                     |                           |
| No              | 1325       | 699624       | 1.89                   | ref                 | ref                       |
| Yes             | 31         | 11492        | 2.70                   | 1.41 (0.99-2.02)    | 1.33 (0.92-1.92)          |
| IHD             |            |              |                        |                     |                           |
| No              | 987        | 610475       | 1.62                   | ref                 | ref                       |
| Yes             | 369        | 100642       | 3.67                   | 2.25 (2.00-2.54)*** | 1.36 (1.19-1.56)***       |
| Stroke          |            |              |                        |                     |                           |
| No              | 1310       | 695656       | 1.88                   | ref                 | ref                       |
| Yes             | 46         | 15461        | 2.98                   | 1.55 (1.15-2.07)**  | 0.85 (0.63-1.14)          |
| CKD             |            |              |                        |                     |                           |
| No              | 1204       | 662599       | 1.82                   | ref                 | ref                       |
| Yes             | 152        | 48517        | 3.13                   | 1.71 (1.45-2.03)*** | 1.06 (0.89-1.26)          |
| Hypothyroidism  |            |              |                        |                     |                           |
| No              | 1343       | 706448       | 1.90                   | ref                 | ref                       |



|                                  |      |        |      |                   |                  |
|----------------------------------|------|--------|------|-------------------|------------------|
| Yes                              | 13   | 4668   | 2.78 | 1.46 (0.85-2.52)  | 1.15 (0.65-2.01) |
| Autoimmune diseases <sup>†</sup> |      |        |      |                   |                  |
| No                               | 1334 | 704142 | 1.89 | ref               | ref              |
| Yes                              | 22   | 6975   | 3.15 | 1.65 (1.08-2.51)* | 1.34 (0.88-2.05) |

Abbreviation: HR, hazard ratio; CI, confidence interval; RA, rheumatoid arthritis; DM, diabetes mellitus; IHD, ischemic heart disease; CKD, chronic kidney disease.

<sup>†</sup>Autoimmune diseases including psoriasis, SLE, systemic sclerosis, Sjogren syndrome, dermatomyositis, polymyositis, and vasculitis.

# per 1000 person-years

<sup>‡</sup>Multivariate Cox proportional hazards regression model, including RA, sex, age (categorical), DM, hyperlipidemia, hypertension, hyperthyroidism, IHD, stroke, CKD, hypothyroidism, and autoimmune diseases.

\* p<0.05, \*\* p<0.01, \*\*\* p<0.001

Table 3. Incidence density and RA cohort to non-RA cohort hazard ratios of hearing loss by sex, age, and comorbidity in the two cohorts

| Variables      | Non-RA cohort |              |                                | RA cohort |              |                                | RA cohort to non-RA cohort |                       |
|----------------|---------------|--------------|--------------------------------|-----------|--------------|--------------------------------|----------------------------|-----------------------|
|                | Event no.     | Person-years | Incidence density <sup>#</sup> | Event no. | Person-years | Incidence density <sup>#</sup> | HR (95% CI)                |                       |
|                |               |              |                                |           |              |                                | Crude                      | Adjusted <sup>‡</sup> |
| Sex            |               |              |                                |           |              |                                |                            |                       |
| Women          | 663           | 454249       | 1.46                           | 314       | 110956       | 2.83                           | 1.94 (1.69-2.22)***        | 1.95 (1.70-2.23)***   |
| Men            | 264           | 117782       | 2.24                           | 115       | 28130        | 4.09                           | 1.82 (1.46-2.27)***        | 1.85 (1.48-2.30)***   |
| Age, years     |               |              |                                |           |              |                                |                            |                       |
| 20-39          | 40            | 98817        | 0.40                           | 19        | 25020        | 0.76                           | 1.89 (1.09-3.26)*          | 1.80 (1.02-3.16)*     |
| 40-59          | 355           | 295193       | 1.20                           | 208       | 72982        | 2.85                           | 2.37 (2.00-2.81)***        | 2.32 (1.95-2.76)***   |
| ≥ 60           | 532           | 178021       | 2.99                           | 202       | 41084        | 4.92                           | 1.63 (1.39-1.92)***        | 1.62 (1.37-1.90)***   |
| Comorbidity    |               |              |                                |           |              |                                |                            |                       |
| DM             |               |              |                                |           |              |                                |                            |                       |
| No             | 765           | 514262       | 1.49                           | 362       | 124722       | 2.90                           | 1.95 (1.72-2.21)***        | 1.94 (1.71-2.20)***   |
| Yes            | 162           | 57770        | 2.80                           | 67        | 14363        | 4.66                           | 1.66 (1.25-2.21)***        | 1.74 (1.30-2.32)***   |
| Hyperlipidemia |               |              |                                |           |              |                                |                            |                       |
| No             | 654           | 464753       | 1.41                           | 320       | 113890       | 2.81                           | 2.00 (1.75-2.28)***        | 1.96 (1.72-2.25)***   |
| Yes            | 273           | 107279       | 2.54                           | 109       | 25195        | 4.33                           | 1.69 (1.36-2.11)***        | 1.74 (1.39-2.18)***   |
| Hypertension   |               |              |                                |           |              |                                |                            |                       |
| No             | 481           | 402716       | 1.19                           | 233       | 97031        | 2.40                           | 2.01 (1.72-2.35)***        | 1.94 (1.66-2.28)***   |
| Yes            | 446           | 169316       | 2.63                           | 196       | 42054        | 4.66                           | 1.76 (1.49-2.08)***        | 1.82 (1.54-2.16)***   |

## Hyperthyroidism

|     |     |        |      |     |        |      |                     |                     |
|-----|-----|--------|------|-----|--------|------|---------------------|---------------------|
| No  | 909 | 563891 | 1.61 | 416 | 135733 | 3.06 | 1.90 (1.69-2.13)*** | 1.92 (1.71-2.16)*** |
| Yes | 18  | 8140   | 2.21 | 13  | 3352   | 3.88 | 1.76 (0.86-3.58)    | 1.72 (0.84-3.55)    |

## IHD

|     |     |        |      |     |        |      |                     |                     |
|-----|-----|--------|------|-----|--------|------|---------------------|---------------------|
| No  | 671 | 491566 | 1.37 | 316 | 118909 | 2.66 | 1.95 (1.70-2.23)*** | 1.96 (1.71-2.24)*** |
| Yes | 256 | 80466  | 3.18 | 113 | 20176  | 5.60 | 1.75 (1.40-2.18)*** | 1.75 (1.40-2.19)*** |

## Stroke

|     |     |        |      |     |        |      |                     |                     |
|-----|-----|--------|------|-----|--------|------|---------------------|---------------------|
| No  | 896 | 559458 | 1.60 | 414 | 136197 | 3.04 | 1.90 (1.69-2.13)*** | 1.90 (1.69-2.14)*** |
| Yes | 31  | 12573  | 2.47 | 15  | 2888   | 5.19 | 2.10 (1.13-3.89)*   | 2.18 (1.16-4.12)*   |

## CKD

|     |     |        |      |     |        |      |                     |                     |
|-----|-----|--------|------|-----|--------|------|---------------------|---------------------|
| No  | 835 | 538065 | 1.55 | 369 | 124534 | 2.96 | 1.91 (1.69-2.16)*** | 1.94 (1.71-2.19)*** |
| Yes | 92  | 33967  | 2.71 | 60  | 14551  | 4.12 | 1.53 (1.11-2.12)*   | 1.73 (1.25-2.42)**  |

## Hypothyroidism

|     |     |        |      |     |        |      |                     |                     |
|-----|-----|--------|------|-----|--------|------|---------------------|---------------------|
| No  | 917 | 569055 | 1.61 | 426 | 137393 | 3.10 | 1.92 (1.71-2.16)*** | 1.94 (1.73-2.18)*** |
| Yes | 10  | 2977   | 3.36 | 3   | 1692   | 1.77 | 0.53 (0.15-1.93)    | 0.69 (0.19-2.57)    |

Autoimmune diseases<sup>†</sup>

|     |     |        |      |     |        |      |                     |                     |
|-----|-----|--------|------|-----|--------|------|---------------------|---------------------|
| No  | 916 | 568956 | 1.61 | 418 | 135186 | 3.09 | 1.92 (1.71-2.15)*** | 1.94 (1.73-2.18)*** |
| Yes | 11  | 3076   | 3.58 | 11  | 3899   | 2.82 | 0.79 (0.34-1.82)    | 0.89 (0.38-2.07)    |

Abbreviation: RA, rheumatoid arthritis; HR, hazard ratio; CI, confidence interval; DM, diabetes mellitus; IHD, ischemic heart disease; CKD, chronic kidney disease.

<sup>†</sup>Autoimmune diseases including psoriasis, SLE, systemic sclerosis, Sjogren syndrome, dermatomyositis, polymyositis, and vasculitis.

<sup>#</sup> per 1000 person-years.

<sup>‡</sup> Model mutually adjusted for sex, age (continuous), DM, hyperlipidemia, hypertension, hyperthyroidism, IHD, stroke, CKD, hypothyroidism, and

1  
2  
3  
4  
5  
6  
7 autoimmune diseases.

8 \* p<0.05, \*\* p<0.01, \*\*\* p<0.001  
9  
10  
11  
12  
13  
14  
15  
16  
17  
18  
19  
20  
21  
22  
23  
24  
25  
26  
27  
28  
29  
30  
31  
32  
33  
34  
35  
36  
37  
38  
39  
40  
41  
42  
43  
44  
45  
46  
47

For peer review only

Table 4. Incidence density and hazard ratios of hearing loss associated with medication in patients with rheumatoid arthritis

| Medicine use       | N     | Event no. | Person-years | Incidence density <sup>#</sup> | HR (95% CI)         |                       |
|--------------------|-------|-----------|--------------|--------------------------------|---------------------|-----------------------|
|                    |       |           |              |                                | Crude               | Adjusted <sup>†</sup> |
| NSAIDs             |       |           |              |                                |                     |                       |
| No                 | 169   | 16        | 532          | 30.1                           | ref                 | ref                   |
| Yes                | 18098 | 413       | 138553       | 2.98                           | 0.11 (0.07-0.18)*** | 0.12 (0.07-0.20)***   |
| Prednisolone       |       |           |              |                                |                     |                       |
| No                 | 1673  | 60        | 11529        | 5.20                           | ref                 | ref                   |
| Yes                | 16594 | 369       | 127556       | 2.89                           | 0.56 (0.43-0.74)*** | 0.53 (0.40-0.70)***   |
| DMARDs             |       |           |              |                                |                     |                       |
| Hydroxychloroquine |       |           |              |                                |                     |                       |
| No                 | 12200 | 309       | 91284        | 3.39                           | ref                 | ref                   |
| Yes                | 6067  | 120       | 47801        | 2.51                           | 0.75 (0.60-0.92)**  | 0.77 (0.62-0.95)*     |
| Sulfasalazine      |       |           |              |                                |                     |                       |
| No                 | 5141  | 148       | 36176        | 4.09                           | ref                 | ref                   |
| Yes                | 13126 | 281       | 102909       | 2.73                           | 0.68 (0.56-0.83)*** | 0.74 (0.61-0.91)**    |
| Methotrexate       |       |           |              |                                |                     |                       |
| No                 | 9261  | 268       | 67188        | 3.99                           | ref                 | ref                   |
| Yes                | 9006  | 161       | 71897        | 2.24                           | 0.57 (0.47-0.69)*** | 0.65 (0.53-0.79)***   |
| Leflunomide        |       |           |              |                                |                     |                       |
| No                 | 15393 | 405       | 116118       | 3.49                           | ref                 | ref                   |
| Yes                | 2874  | 24        | 22967        | 1.04                           | 0.30 (0.20-0.45)*** | 0.33 (0.22-0.50)***   |
| TNF                |       |           |              |                                |                     |                       |
| Etanercept         |       |           |              |                                |                     |                       |
| No                 | 16259 | 408       | 122506       | 3.33                           | ref                 | ref                   |
| Yes                | 2008  | 21        | 16579        | 1.27                           | 0.39 (0.25-0.60)*** | 0.44 (0.28-0.68)***   |
| Adalimumab         |       |           |              |                                |                     |                       |
| No                 | 17317 | 424       | 131303       | 3.23                           | ref                 | ref                   |
| Yes                | 950   | 5         | 7783         | 0.64                           | 0.20 (0.08-0.48)*** | 0.23 (0.10-0.55)**    |

Abbreviation: HR, hazard ratio; CI, confidence interval RA, rheumatoid arthritis; NSAID, non-steroidal anti-inflammatory drug; DMARDs, disease-modifying antirheumatic drugs; TNF, tumor necrosis factor.

<sup>#</sup> per 1000 person-years.

<sup>†</sup> Model adjusted for sex, age, DM, hyperlipidemia, hypertension, hyperthyroidism, IHD, stroke, CKD, hypothyroidism, and autoimmune diseases.

\* p<0.05, \*\* p<0.01, \*\*\* p<0.001

Table 5. Incidence density and hazard ratios for subtypes of hearing loss according to rheumatoid arthritis status

| Types of hearing loss | Rheumatoid arthritis |                                |           |                                | Compared to non-TTH group |                       |
|-----------------------|----------------------|--------------------------------|-----------|--------------------------------|---------------------------|-----------------------|
|                       | No                   |                                | Yes       |                                | HR (95% CI)               |                       |
|                       | Event no.            | Incidence density <sup>#</sup> | Event no. | Incidence density <sup>#</sup> | Crude                     | Adjusted <sup>†</sup> |
| Sensorineural         | 249                  | 0.44                           | 144       | 1.04                           | 2.38 (1.94-2.92)***       | 2.35 (1.91-2.89)***   |
| Conductive            | 10                   | 0.02                           | 1         | 0.01                           | 0.41 (0.05-3.21)          | 0.41 (0.05-3.23)      |
| Mixed                 | 668                  | 1.17                           | 284       | 2.04                           | 1.75 (1.52-2.01)***       | 1.77 (1.54-2.03)***   |

ICD-9-CM: sensorineural, 389.10 and 389.12; conductive, 389.00; mixed, 388.2, 388.4, 389.2, and 389.9.

Abbreviation: HR, hazard ratio; CI, confidence interval; TTH,.

<sup>#</sup> per 1000 person-years.

<sup>†</sup> Model adjusted for sex, age (continuous), DM, hyperlipidemia, hypertension, hyperthyroidism, IHD, stroke, CKD, hypothyroidism, and autoimmune diseases.

\*\*\* p<0.001.

1  
2  
3  
4  
5  
6  
7  
8  
9  
10  
11  
12  
13  
14  
15  
16  
17  
18  
19  
20  
21  
22  
23  
24  
25  
26  
27  
28  
29  
30  
31  
32  
33  
34  
35  
36  
37  
38  
39  
40  
41  
42  
43  
44  
45  
46  
47

Fig 1. Flowchart showing selection of study cohorts

LHID, Longitudinal Health Insurance Database; RA, rheumatoid arthritis

For peer review only

1  
2  
3  
4  
5  
6  
7 Fig 2. Kaplan-Meier method estimated Cumulative incidence curves of hearing loss in  
8 the two cohorts  
9 RA, rheumatoid arthritis  
10  
11  
12  
13  
14  
15  
16  
17  
18  
19  
20  
21  
22  
23  
24  
25  
26  
27  
28  
29  
30  
31  
32  
33  
34  
35  
36  
37  
38  
39  
40  
41  
42  
43  
44  
45  
46  
47  
48  
49  
50  
51  
52  
53  
54  
55  
56  
57  
58  
59  
60



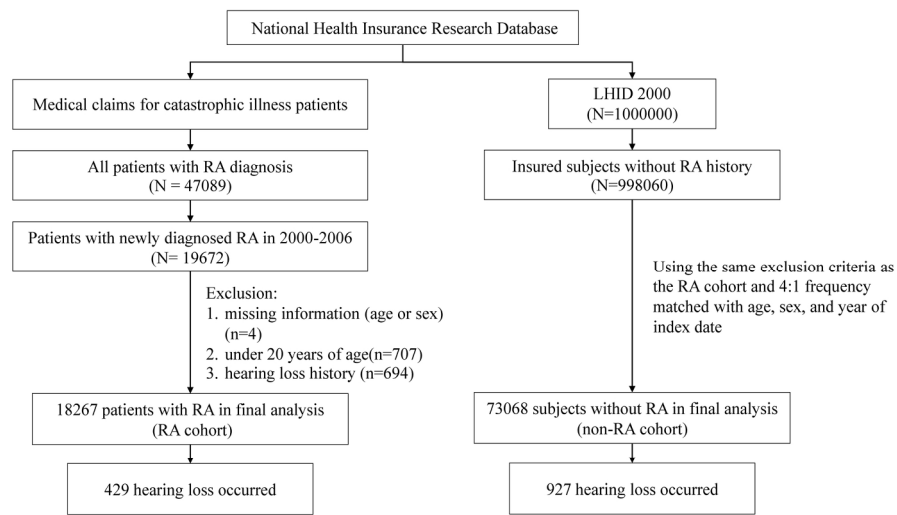

190x107mm (300 x 300 DPI)

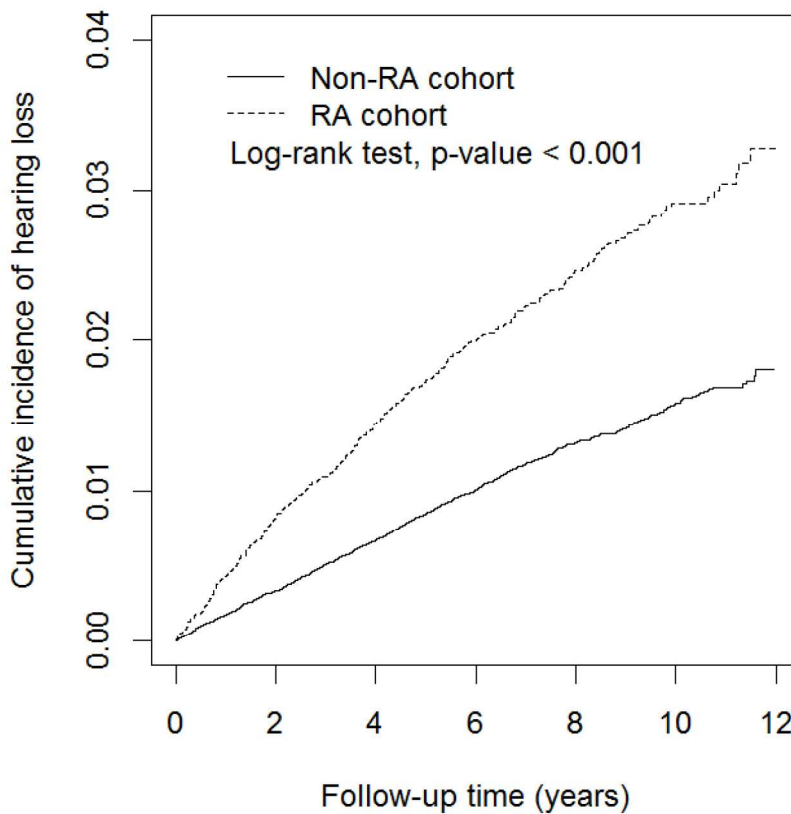

No. at risk

|               |       |       |       |       |       |       |
|---------------|-------|-------|-------|-------|-------|-------|
| Non-RA cohort | 73068 | 70979 | 68952 | 56187 | 35795 | 16093 |
| RA cohort     | 18267 | 17445 | 16643 | 13564 | 8541  | 3836  |

199x209mm (300 x 300 DPI)

**STROBE Statement**

## Checklist of items that should be included in reports of observational studies

| Section/Topic                                                                                      | Item No | Recommendation                                                                                                                                                                             | Reported on Page No |
|----------------------------------------------------------------------------------------------------|---------|--------------------------------------------------------------------------------------------------------------------------------------------------------------------------------------------|---------------------|
| <b>Title and abstract</b>                                                                          | 1       | (a) Indicate the study's design with a commonly used term in the title or the abstract                                                                                                     | 1,2                 |
|                                                                                                    |         | (b) Provide in the abstract an informative and balanced summary of what was done and what was found                                                                                        | 2,3                 |
| <b>Introduction</b>                                                                                |         |                                                                                                                                                                                            |                     |
| Background/rationale                                                                               | 2       | Explain the scientific background and rationale for the investigation being reported                                                                                                       | 5                   |
| Objectives                                                                                         | 3       | State specific objectives, including any prespecified hypotheses                                                                                                                           | 6                   |
| <b>Methods</b>                                                                                     |         |                                                                                                                                                                                            |                     |
| Study design                                                                                       | 4       | Present key elements of study design early in the paper                                                                                                                                    | 6                   |
| Setting                                                                                            | 5       | Describe the setting, locations, and relevant dates, including periods of recruitment, exposure, follow-up, and data collection                                                            | 6,7                 |
| Participants                                                                                       | 6       | (a) <i>Cohort study</i> —Give the eligibility criteria, and the sources and methods of selection of participants. Describe methods of follow-up                                            | 7,8                 |
|                                                                                                    |         | <i>Case-control study</i> —Give the eligibility criteria, and the sources and methods of case ascertainment and control selection. Give the rationale for the choice of cases and controls |                     |
|                                                                                                    |         | <i>Cross-sectional study</i> —Give the eligibility criteria, and the sources and methods of selection of participants                                                                      |                     |
| Variables                                                                                          | 7       | (b) <i>Cohort study</i> —For matched studies, give matching criteria and number of exposed and unexposed                                                                                   | 7,8                 |
|                                                                                                    |         | <i>Case-control study</i> —For matched studies, give matching criteria and the number of controls per case                                                                                 |                     |
| Data sources/measurement                                                                           | 8*      | Clearly define all outcomes, exposures, predictors, potential confounders, and effect modifiers. Give diagnostic criteria, if applicable                                                   | 8                   |
| Bias                                                                                               | 9       | For each variable of interest, give sources of data and details of methods of assessment (measurement). Describe comparability of assessment methods if there is more than one group       | 8                   |
| Study size                                                                                         | 10      | Describe any efforts to address potential sources of bias                                                                                                                                  | 8                   |
| Quantitative variables                                                                             | 11      | Explain how the study size was arrived at                                                                                                                                                  | 7,8                 |
| Statistical methods                                                                                | 12      | Explain how quantitative variables were handled in the analyses. If applicable, describe which groupings were chosen and why                                                               | 7,8                 |
|                                                                                                    |         | (a) Describe all statistical methods, including those used to control for confounding                                                                                                      | 8,9                 |
|                                                                                                    |         | (b) Describe any methods used to examine subgroups and interactions                                                                                                                        | 8,9                 |
|                                                                                                    |         | (c) Explain how missing data were addressed                                                                                                                                                | 26                  |
|                                                                                                    |         | (d) <i>Cohort study</i> —If applicable, explain how loss to follow-up was addressed                                                                                                        | 26                  |
| <i>Case-control study</i> —If applicable, explain how matching of cases and controls was addressed |         |                                                                                                                                                                                            |                     |
|                                                                                                    |         | <i>Cross-sectional study</i> —If applicable, describe analytical methods taking account of sampling strategy                                                                               | 9                   |
|                                                                                                    |         | (e) Describe any sensitivity analyses                                                                                                                                                      | 9                   |

| Section/Topic            | Item No | Recommendation                                                                                                                                                                                               | Reported on Page No |
|--------------------------|---------|--------------------------------------------------------------------------------------------------------------------------------------------------------------------------------------------------------------|---------------------|
| <b>Results</b>           |         |                                                                                                                                                                                                              |                     |
| Participants             | 13*     | (a) Report numbers of individuals at each stage of study—eg numbers potentially eligible, examined for eligibility, confirmed eligible, included in the study, completing follow-up, and analysed            | 10                  |
|                          |         | (b) Give reasons for non-participation at each stage                                                                                                                                                         | 26                  |
|                          |         | (c) Consider use of a flow diagram                                                                                                                                                                           | 26                  |
| Descriptive data         | 14*     | (a) Give characteristics of study participants (eg demographic, clinical, social) and information on exposures and potential confounders                                                                     | 10,22               |
|                          |         | (b) Indicate number of participants with missing data for each variable of interest                                                                                                                          | 26                  |
|                          |         | (c) <i>Cohort study</i> —Summarise follow-up time (eg, average and total amount)                                                                                                                             | 10,27               |
| Outcome data             | 15*     | <i>Cohort study</i> —Report numbers of outcome events or summary measures over time                                                                                                                          | 10,27               |
|                          |         | <i>Case-control study</i> —Report numbers in each exposure category, or summary measures of exposure                                                                                                         |                     |
|                          |         | <i>Cross-sectional study</i> —Report numbers of outcome events or summary measures                                                                                                                           |                     |
| Main results             | 16      | (a) Give unadjusted estimates and, if applicable, confounder-adjusted estimates and their precision (eg, 95% confidence interval). Make clear which confounders were adjusted for and why they were included | 10,23               |
|                          |         | (b) Report category boundaries when continuous variables were categorized                                                                                                                                    |                     |
|                          |         | (c) If relevant, consider translating estimates of relative risk into absolute risk for a meaningful time period                                                                                             |                     |
| Other analyses           | 17      | Report other analyses done—eg analyses of subgroups and interactions, and sensitivity analyses                                                                                                               | 10,11,24            |
| <b>Discussion</b>        |         |                                                                                                                                                                                                              |                     |
| Key results              | 18      | Summarise key results with reference to study objectives                                                                                                                                                     | 11                  |
| Limitations              | 19      | Discuss limitations of the study, taking into account sources of potential bias or imprecision. Discuss both direction and magnitude of any potential bias                                                   | 14                  |
| Interpretation           | 20      | Give a cautious overall interpretation of results considering objectives, limitations, multiplicity of analyses, results from similar studies, and other relevant evidence                                   | 11-14               |
| Generalisability         | 21      | Discuss the generalisability (external validity) of the study results                                                                                                                                        | 13,14               |
| <b>Other Information</b> |         |                                                                                                                                                                                                              |                     |
| Funding                  | 22      | Give the source of funding and the role of the funders for the present study and, if applicable, for the original study on which the present article is based                                                | 15                  |

\*Give information separately for cases and controls in case-control studies and, if applicable, for exposed and unexposed groups in cohort and cross-sectional studies.

**Note:** An Explanation and Elaboration article discusses each checklist item and gives methodological background and published examples of transparent reporting. The STROBE checklist is best used in conjunction with this article (freely available on the Web sites of PLoS Medicine at <http://www.plosmedicine.org/>, Annals of Internal Medicine at <http://www.annals.org/>, and Epidemiology at <http://www.epidem.com/>). Information on the STROBE Initiative is available at [www.strobe-statement.org](http://www.strobe-statement.org).
